# Supplementary material for: Transcriptomic Profiling Identifies Candidate Genes Involved in the Salt Tolerance of the Xerophyte Pugionium cornutum
Source: PubMed Central journal article supplement (PMC6947847; doi:10.3390/genes10121039), 2019-12-12
Supplement: genes-10-01039-s001.pdf [file genes-10-01039-s001.pdf]

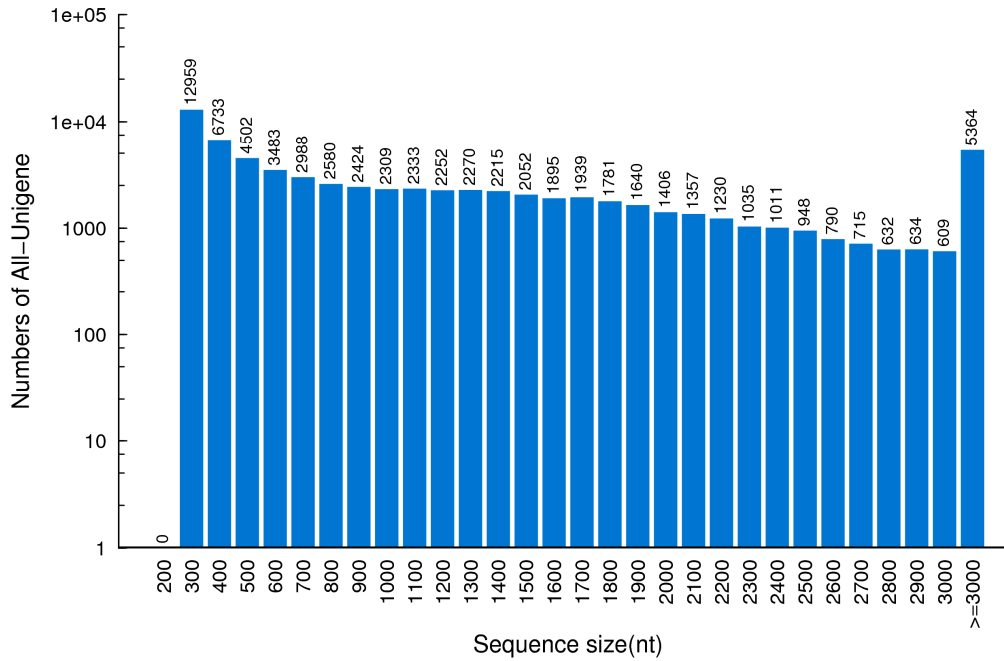

**Figure S1.** Length distribution of all assembled unigenes.

**Table S1.** Sequencing production statistics.

| Samples | Total Raw Reads | Total Clean Reads | GC percentage |
|---------|-----------------|-------------------|---------------|
| Shoot   | 118059830       | 115777772         | 45.01%        |
| Root    | 119410188       | 117031190         | 46.26%        |

**Table S2.** Summary of sequence annotation.

| Database   | NR     | NT     | Swiss-Prot | KEGG   | COG    | GO     | All    |
|------------|--------|--------|------------|--------|--------|--------|--------|
| Numbers    | 57695  | 60628  | 39893      | 35136  | 24608  | 53435  | 63396  |
| Percentage | 80.01% | 84.11% | 55.34%     | 48.74% | 34.14% | 74.13% | 87.94% |

**Table S3.** Differentially expressed genes (DEGs) related to ion transport in roots of *P. cornutum* after 50 mM NaCl treatment for 6 h. C6R RPKM and S6R RPKM indicates the RPKM value of a gene in roots under control condition for 6 h and salt treatment for 6 h respectively. Fold change equals to  $\log_2$ (S6R RPKM / C6R RPKM) and indicates the transcript abundance change of each DEGs. Protein is the protein encoded by each DEGs. The Gene ID of each upregulated DEGs with no expression under control condition is in bold.

| Gene ID                   | C6R RPKM | S6R RPKM | Log <sub>2</sub> Ratio | Protein | Most homologous species     |
|---------------------------|----------|----------|------------------------|---------|-----------------------------|
| <b>CL5647.Contig1_All</b> | 0.01     | 3.42     | 8.42                   | SLAH1   | <i>Arabidopsis thaliana</i> |
| <b>CL4502.Contig2_All</b> | 0.01     | 6.64     | 9.38                   | CLCa    | <i>Arabidopsis thaliana</i> |
| CL2477.Contig4_All        | 3.02     | 6.3      | 1.06                   | CLCg    | <i>Camelina sativa</i>      |
| Unigene6878_All           | 0.19     | 1.72     | 3.18                   | NPF5.1  | <i>Camelina sativa</i>      |
| CL8124.Contig3_All        | 4.14     | 26.37    | 2.67                   | NPF6.3b | <i>Eutrema salsugineum</i>  |
| Unigene20640_All          | 1.18     | 6.29     | 2.41                   | NPF2.6  | <i>Eutrema salsugineum</i>  |
| Unigene16336_All          | 5.37     | 10.66    | 1.99                   | NPF8.1b | <i>Brassica napus</i>       |
| CL1892.Contig3_All        | 7.52     | 18.06    | 1.26                   | NPF2.11 | <i>Eutrema salsugineum</i>  |
| CL7387.Contig1_All        | 0.04     | 0.09     | 1.17                   | NPF6.4a | <i>Eutrema salsugineum</i>  |
| Unigene17986_All          | 0.52     | 1.13     | 1.12                   | NPF5.4  | <i>Brassica napus</i>       |
| CL3282.Contig3_All        | 10.49    | 5.24     | -1.01                  | NPF6.2  | <i>Eutrema salsugineum</i>  |

|                            |       |       |        |                             |                             |
|----------------------------|-------|-------|--------|-----------------------------|-----------------------------|
| Unigene2805_All            | 3.66  | 1.7   | -1.11  | NPF3.1                      | <i>Eutrema salsugineum</i>  |
| CL1188.Contig3_All         | 1.36  | 0.01  | -7.09  | NPF8.4                      | <i>Eutrema salsugineum</i>  |
| <b>CL141.Contig3_All</b>   | 0.01  | 0.44  | 5.46   | SOS1                        | <i>Brassica rapa</i>        |
| <b>CL1096.Contig10_All</b> | 0.01  | 1.39  | 7.12   | NHX6                        | <i>Arabidopsis thaliana</i> |
| CL1096.Contig4_All         | 0.63  | 2.27  | 1.85   | NHX5                        | <i>Arabidopsis thaliana</i> |
| CL141.Contig5_All          | 1.56  | 0.01  | -7.29  | NHX8                        | <i>Camelina sativa</i>      |
| CL6534.Contig4_All         | 21.32 | 10.25 | -1.06  | NCX                         | <i>Arabidopsis thaliana</i> |
| <b>CL3604.Contig8_All</b>  | 0.01  | 4.61  | 8.85   | GLR3.3a                     | <i>Brassica napus</i>       |
| <b>CL415.Contig2_All</b>   | 0.01  | 0.79  | 6.30   | GLR3.2                      | <i>Arabidopsis thaliana</i> |
| CL5397.Contig2_All         | 0.78  | 8.44  | 3.44   | GLR2.5                      | <i>Camelina sativa</i>      |
| CL3604.Contig12_All        | 0.84  | 3.79  | 2.17   | GLR3.3b                     | <i>Camelina sativa</i>      |
| CL1280.Contig5_All         | 0.92  | 5.85  | 2.67   | KUP2                        | <i>Arabidopsis thaliana</i> |
| Unigene20531_All           | 8.32  | 22    | 1.40   | KT3                         | <i>Brassica napus</i>       |
| CL2337.Contig11_All        | 11.52 | 5.51  | -1.06  | KUP10                       | <i>Arabidopsis thaliana</i> |
| CL9487.Contig2_All         | 23.25 | 10.77 | -1.11  | HAK2                        | <i>Arabidopsis thaliana</i> |
| Unigene10500_All           | 28.72 | 10.46 | -1.46  | HAK10                       | <i>Arabidopsis thaliana</i> |
| CL2337.Contig2_All         | 1.65  | 0.58  | -1.51  | HAK9                        | <i>Arabidopsis thaliana</i> |
| Unigene17269_All           | 2.66  | 0.01  | -8.06  | KT2d                        | <i>Camelina sativa</i>      |
| <b>CL1585.Contig2_All</b>  | 0.01  | 0.77  | 6.27   | KEA6                        | <i>Brassica rapa</i>        |
| CL6926.Contig3_All         | 1.73  | 3.86  | 1.16   | KEA1                        | <i>Brassica napus</i>       |
| CL3137.Contig2_All         | 7.53  | 0.01  | -9.56  | KEA5                        | <i>Arabidopsis thaliana</i> |
| <b>CL3663.Contig5_All</b>  | 0.01  | 0.56  | 5.81   | CNGC6a                      | <i>Camelina sativa</i>      |
| Unigene11269_All           | 6.4   | 14.37 | 1.17   | CNGC6b                      | <i>Arabidopsis thaliana</i> |
| CL3663.Contig3_All         | 2.13  | 4.62  | 1.12   | CNGC9                       | <i>Camelina sativa</i>      |
| Unigene30942_All           | 19.84 | 4.09  | -2.28  | CNGC6d                      | <i>Arabidopsis thaliana</i> |
| Unigene17269_All           | 2.66  | 0.01  | -8.06  | CNGC6c                      | <i>Arabidopsis thaliana</i> |
| <b>CL3206.Contig3_All</b>  | 0.01  | 1.57  | 7.29   | Sultr1.2a                   | <i>Brassica rapa</i>        |
| Unigene16699_All           | 0.27  | 2.76  | 3.35   | Sultr1.2b                   | <i>Brassica rapa</i>        |
| Unigene20847_All           | 1.66  | 9.74  | 2.55   | Sultr3.5                    | <i>Brassica napus</i>       |
| Unigene20242_All           | 4.61  | 11.14 | 1.27   | Sultr1.1                    | <i>Brassica napus</i>       |
| CL7785.Contig1_All         | 2.29  | 5.43  | 1.25   | Sultr3.3                    | <i>Brassica napus</i>       |
| CL6298.Contig1_All         | 7.09  | 3.38  | -1.07  | Sultr3.1                    | <i>Arabidopsis thaliana</i> |
| <b>CL564.Contig8_All</b>   | 0.01  | 6.23  | 9.28   | PHT4.3                      | <i>Arabidopsis thaliana</i> |
| <b>CL5169.Contig1_All</b>  | 0.01  | 1.1   | 6.78   | PHT2.1                      | <i>Camelina sativa</i>      |
| CL7753.Contig1_All         | 0.7   | 4.42  | 2.66   | PHT1.3a                     | <i>Brassica napus</i>       |
| Unigene16890_All           | 4.59  | 12.17 | 1.41   | PHT1.3b                     | <i>Camelina sativa</i>      |
| Unigene11734_All           | 3.59  | 7.65  | 1.09   | PHO1                        | <i>Brassica napus</i>       |
| CL5434.Contig3_All         | 1.59  | 14.72 | 3.21   | ZnT8                        | <i>Camelina sativa</i>      |
| CL9009.Contig1_All         | 4.7   | 9.58  | 1.03   | ZnT1                        | <i>Camelina sativa</i>      |
| <b>Unigene4968_All</b>     | 0.01  | 47.35 | 12.21  | CTR5a                       | <i>Brassica napus</i>       |
| CL5383.Contig1_All         | 6.4   | 13.95 | 1.12   | CTR2                        | <i>Brassica rapa</i>        |
| CL2038.Contig2_All         | 2.35  | 0.01  | -7.88  | CTR CCHb                    | <i>Brassica napus</i>       |
| CL2038.Contig1_All         | 1.2   | 0.01  | -6.91  | CTR CCHa                    | <i>Brassica rapa</i>        |
| Unigene29796_All           | 48.01 | 0.01  | -12.23 | CTR5c                       | <i>Brassica napus</i>       |
| <b>CL2740.Contig1_All</b>  | 0.01  | 11.53 | 10.17  | MnT PDR2                    | <i>Camelina sativa</i>      |
| CL5434.Contig1_All         | 27.17 | 61.31 | 1.17   | IRT1                        | <i>Brassica rapa</i>        |
| <b>CL666.Contig5_All</b>   | 0.01  | 2.54  | 7.99   | BOR4b                       | <i>Arabidopsis thaliana</i> |
| <b>CL666.Contig2_All</b>   | 0.01  | 0.99  | 6.63   | BOR4a                       | <i>Arabidopsis thaliana</i> |
| CL6525.Contig1_All         | 1.87  | 0.01  | -7.55  | BOR3                        | <i>Arabidopsis thaliana</i> |
| CL4850.Contig2_All         | 0.81  | 7.42  | 3.20   | V-H <sup>+</sup> ATPase h   | <i>Brassica napus</i>       |
| Unigene5842_All            | 18.31 | 42.37 | 1.21   | V-H <sup>+</sup> ATPase e3  | <i>Arabidopsis thaliana</i> |
| Unigene4758_All            | 15.72 | 31.65 | 1.01   | V-H <sup>+</sup> ATPase g2  | <i>Camelina sativa</i>      |
| CL1819.Contig2_All         | 13.69 | 98.18 | 2.84   | P-H <sup>+</sup> ATPase     | <i>Arabidopsis thaliana</i> |
| Unigene18921_All           | 1.44  | 6.8   | 2.24   | P-H <sup>+</sup> ATPase 7a  | <i>Arabidopsis thaliana</i> |
| Unigene17708_All           | 0.99  | 4.57  | 2.21   | P-H <sup>+</sup> ATPase 7b  | <i>Arabidopsis thaliana</i> |
| Unigene19782_All           | 1.83  | 6.31  | 1.79   | P-Ca <sup>2+</sup> ATPase 7 | <i>Brassica rapa</i>        |

**Table S4.** Differentially expressed genes (DEGs) related to ion transport in roots of *P. cornutum* after 50 mM NaCl treatment for 24 h. C24R RPKM and S24R RPKM indicates the RPKM value of a gene in roots under control condition for 24 h and salt treatment for 24 h respectively. Fold change equals to  $\log_2$  (S24R RPKM / C24R RPKM) and indicates the transcript abundance change of each DEGs. Protein is the protein encoded by each DEGs. The Gene ID of each upregulated DEGs with no expression under control condition is in bold.

| Gene ID                    | C24R RPKM | S24R RPKM | Log <sub>2</sub> Ratio | Protein   | Most homologous species        |
|----------------------------|-----------|-----------|------------------------|-----------|--------------------------------|
| <b>CL5647.Contig1_All</b>  | 0.01      | 2.13      | 7.73                   | SLAH1     | <i>Arabidopsis thaliana</i>    |
| Unigene29334_All           | 7.91      | 0.59      | -3.74                  | CCC1      | <i>Raphanus Sativus</i>        |
| <b>CL2477.Contig4_All</b>  | 0.01      | 6.31      | 9.30                   | CLCg      | <i>Camelina sativa</i>         |
| CL2577.Contig2_All         | 1.14      | 9.64      | 3.08                   | CLCf      | <i>Camelina sativa</i>         |
| <b>CL7387.Contig1_All</b>  | 0.01      | 0.08      | 3                      | NPF6.4a   | <i>Eutrema salsugineum</i>     |
| CL1209.Contig4_All         | 0.26      | 1.55      | 2.58                   | NPF2.13   | <i>Brassica napus</i>          |
| CL8124.Contig1_All         | 15.86     | 55.97     | 1.82                   | NPF6.3a   | <i>Eutrema salsugineum</i>     |
| CL1188.Contig2_All         | 1.11      | 3.82      | 1.78                   | NPF8.4    | <i>Eutrema salsugineum</i>     |
| Unigene2805_All            | 2.76      | 8.19      | 1.57                   | NPF3.1a   | <i>Eutrema salsugineum</i>     |
| CL3282.Contig2_All         | 3.14      | 9.15      | 1.54                   | NPF6.2    | <i>Eutrema salsugineum</i>     |
| Unigene3586_All            | 23.67     | 65.48     | 1.47                   | NPF5.7    | <i>Eutrema salsugineum</i>     |
| CL6278.Contig1_All         | 5.28      | 12.92     | 1.29                   | NPF8.1a   | <i>Eutrema salsugineum</i>     |
| CL568.Contig1_All          | 81.87     | 200.72    | 1.29                   | NPF2.1    | <i>Brassica napus</i>          |
| Unigene16246_All           | 326.5     | 671.44    | 1.04                   | NPF3.1b   | <i>Eutrema salsugineum</i>     |
| CL7387.Contig2_All         | 0.84      | 0.38      | -1.14                  | NPF6.4b   | <i>Eutrema salsugineum</i>     |
| Unigene21409_All           | 2.4       | 0.18      | -3.74                  | NPF5.9    | <i>Arabidopsis thaliana</i>    |
| Unigene17986_All           | 1.83      | 0.01      | -7.52                  | NPF5.4    | <i>Brassica napus</i>          |
| Unigene7084_All            | 3.39      | 0.01      | -8.41                  | NPF5.2    | <i>Eutrema salsugineum</i>     |
| CL141.Contig3_All          | 0.79      | 0.01      | -6.30                  | SOS1      | <i>Brassica rapa</i>           |
| <b>CL1096.Contig4_All</b>  | 0.01      | 1.52      | 7.25                   | NHX5      | <i>Arabidopsis thaliana</i>    |
| <b>CL1096.Contig10_All</b> | 0.01      | 0.67      | 6.07                   | NHX6      | <i>Arabidopsis thaliana</i>    |
| CL4173.Contig3_All         | 6.05      | 12.19     | 1.01                   | NHX1      | <i>Thellungiella halophila</i> |
| <b>CL3604.Contig8_All</b>  | 0.01      | 1.11      | 6.79                   | GLR3.3a   | <i>Brassica napus</i>          |
| CL8010.Contig2_All         | 2.18      | 4.63      | 1.09                   | GLR3.6    | <i>Camelina sativa</i>         |
| CL66.Contig1_All           | 1.4       | 2.83      | 1.02                   | GLR3.4    | <i>Arabidopsis thaliana</i>    |
| CL5397.Contig1_All         | 6.39      | 1.1       | -2.54                  | GLR2.5    | <i>Camelina sativa</i>         |
| CL415.Contig2_All          | 1.52      | 0.2       | -2.93                  | GLR3.2    | <i>Arabidopsis thaliana</i>    |
| <b>CL5926.Contig2_All</b>  | 0.01      | 2.77      | 8.11                   | KT2c      | <i>Brassica napus</i>          |
| CL2362.Contig2_All         | 3.1       | 12.56     | 2.02                   | HAK3      | <i>Arabidopsis thaliana</i>    |
| CL2337.Contig2_All         | 1.85      | 0.64      | -1.53                  | KUP9      | <i>Arabidopsis thaliana</i>    |
| CL596.Contig4_All          | 0.87      | 0.01      | -6.44                  | KUP5      | <i>Arabidopsis thaliana</i>    |
| CL1280.Contig6_All         | 1.16      | 0.01      | -6.86                  | KT2a      | <i>Arabidopsis thaliana</i>    |
| CL1599.Contig1_All         | 2.35      | 6.84      | 1.54                   | KEA4      | <i>Camelina sativa</i>         |
| CL3137.Contig2_All         | 1.61      | 4.56      | 1.50                   | KEA5      | <i>Arabidopsis thaliana</i>    |
| CL1585.Contig2_All         | 1.54      | 0.23      | -2.74                  | KEA6      | <i>Brassica rapa</i>           |
| CL3568.Contig2_All         | 2.64      | 7.13      | 1.43                   | CNGC2     | <i>Arabidopsis thaliana</i>    |
| Unigene30942_All           | 6.09      | 1.82      | -1.74                  | CNGC6d    | <i>Camelina sativa</i>         |
| Unigene5024_All            | 120.14    | 31.83     | -1.92                  | CNGC1a    | <i>Camelina sativa</i>         |
| CL3663.Contig4_All         | 0.79      | 0.01      | -6.30                  | CNGC6a    | <i>Arabidopsis thaliana</i>    |
| <b>CL9511.Contig3_All</b>  | 0.01      | 67.18     | 12.71                  | V-CHX C2  | <i>Arabidopsis thaliana</i>    |
| CL3206.Contig3_All         | 2.14      | 14.28     | 2.74                   | Sultr1.2a | <i>Brassica rapa</i>           |
| CL7785.Contig1_All         | 0.44      | 2.92      | 2.73                   | Sultr3.3  | <i>Camelina sativa</i>         |
| CL6298.Contig1_All         | 1         | 4.96      | 2.31                   | Sultr3.1  | <i>Camelina sativa</i>         |
| Unigene9574_All            | 27.72     | 63.02     | 1.18                   | Sultr2.1  | <i>Arabidopsis thaliana</i>    |
| CL7451.Contig2_All         | 2.7       | 5.56      | 1.04                   | Sultr2.2  | <i>Brassica rapa</i>           |
| <b>CL564.Contig8_All</b>   | 0.01      | 0.88      | 6.46                   | PHT4.3    | <i>Arabidopsis thaliana</i>    |
| Unigene1737_All            | 4.91      | 9.97      | 1.02                   | PHT4.2b   | <i>Arabidopsis thaliana</i>    |
| CL128.Contig2_All          | 3.26      | 0.01      | -8.35                  | PHT2.1    | <i>Camelina sativa</i>         |

|                           |        |        |       |                              |                             |
|---------------------------|--------|--------|-------|------------------------------|-----------------------------|
| CL5169.Contig1_All        | 5.93   | 0.01   | -9.21 | PHT4.2a                      | <i>Arabidopsis thaliana</i> |
| CL9009.Contig4_All        | 3.71   | 0.78   | -2.25 | ZnT12                        | <i>Brassica napus</i>       |
| CL1249.Contig2_All        | 1.44   | 0.01   | -7.17 | ZnT1                         | <i>Camelina sativa</i>      |
| <b>CL8249.Contig3_All</b> | 0.01   | 5.07   | 8.99  | CTR PAA1                     | <i>Brassica rapa</i>        |
| CL5383.Contig1_All        | 30.48  | 6.43   | -2.24 | CTR2                         | <i>Brassica rapa</i>        |
| CL2038.Contig2_All        | 146.3  | 5.86   | -4.64 | CTR CCH                      | <i>Brassica napus</i>       |
| CL2740.Contig1_All        | 9.15   | 23.65  | 1.37  | MnT PDR2                     | <i>Camelina sativa</i>      |
| Unigene29828_All          | 16.71  | 6.32   | -1.40 | MgT                          | <i>Camelina sativa</i>      |
| Unigene17329_All          | 13.3   | 34.56  | 1.38  | AMT1.2                       | <i>Arabidopsis thaliana</i> |
| CL6691.Contig2_All        | 33.15  | 71.56  | 1.11  | AMT1.1                       | <i>Camelina sativa</i>      |
| CL1590.Contig1_All        | 1.74   | 0.12   | -3.86 | AMT2                         | <i>Brassica rapa</i>        |
| CL5434.Contig1_All        | 57.15  | 21.97  | -1.38 | IRT1                         | <i>Brassica rapa</i>        |
| CL666.Contig1_All         | 5.62   | 16.45  | 1.55  | BOR4a                        | <i>Arabidopsis thaliana</i> |
| CL3720.Contig3_All        | 2.9    | 0.01   | -8.18 | BOR4b                        | <i>Arabidopsis thaliana</i> |
| Unigene21511_All          | 23.88  | 66     | 1.47  | V-H <sup>+</sup> ATPase b1   | <i>Arabidopsis thaliana</i> |
| Unigene606_All            | 14.35  | 39.47  | 1.46  | V-H <sup>+</sup> ATPase c1   | <i>Camelina sativa</i>      |
| Unigene3164_All           | 36.62  | 89.93  | 1.30  | V-H <sup>+</sup> ATPase f    | <i>Camelina sativa</i>      |
| CL6281.Contig4_All        | 51.85  | 109.09 | 1.07  | V-H <sup>+</sup> ATPase e2   | <i>Brassica napus</i>       |
| Unigene13114_All          | 87.87  | 31.7   | -1.47 | V-H <sup>+</sup> ATPase g1   | <i>Brassica napus</i>       |
| CL4850.Contig2_All        | 13.77  | 0.89   | -3.96 | V-H <sup>+</sup> ATPase h    | <i>Camelina sativa</i>      |
| CL1819.Contig2_All        | 132.35 | 33.53  | -1.98 | P-H <sup>+</sup> ATPase      | <i>Arabidopsis thaliana</i> |
| Unigene3819_All           | 12.66  | 4.73   | -1.42 | P-Ca <sup>2+</sup> ATPase 8  | <i>Brassica napus</i>       |
| Unigene8285_All           | 13.91  | 3.35   | -2.05 | P-Ca <sup>2+</sup> ATPase 13 | <i>Arabidopsis thaliana</i> |
| CL5374.Contig2_All        | 4.3    | 0.55   | -2.97 | P-Ca <sup>2+</sup> ATPase 11 | <i>Camelina sativa</i>      |

**Table S5.** Differentially expressed genes (DEGs) related to ion transport in shoots of *P. cornutum* after 50 mM NaCl treatment for 6 h. C6S RPKM and S6S RPKM indicates the RPKM value of a gene in shoots under control condition for 6 h and salt treatment for 6 h respectively. Fold change equals to  $\log_2$  (S6S RPKM / C6S RPKM) and indicates the transcript abundance change of each DEGs. Protein is the protein encoded by each DEGs. The Gene ID of each upregulated DEGs with no expression under control condition is in bold.

| Gene ID                   | C6S RPKM | S6S RPKM | Log <sub>2</sub> Ratio | Protein | Most homologous species        |
|---------------------------|----------|----------|------------------------|---------|--------------------------------|
| CL4002.Contig2_All        | 1.6      | 4.04     | 1.34                   | CCC1    | <i>Camelina sativa</i>         |
| <b>CL2577.Contig2_All</b> | 0.01     | 2.52     | 7.98                   | CLCf    | <i>Camelina sativa</i>         |
| <b>CL4502.Contig3_All</b> | 0.01     | 2.0      | 7.69                   | CLCb    | <i>Camelina sativa</i>         |
| CL2477.Contig4_All        | 2.98     | 15.98    | 2.42                   | CLCg    | <i>Camelina sativa</i>         |
| CL4502.Contig2_All        | 5.7      | 0.01     | -9.15                  | CLCa    | <i>Arabidopsis thaliana</i>    |
| <b>Unigene7084_All</b>    | 0.01     | 1.44     | 7.17                   | NPF5.2  | <i>Eutrema salsugineum</i>     |
| <b>CL3282.Contig2_All</b> | 0.01     | 1.35     | 7.08                   | NPF6.2b | <i>Eutrema salsugineum</i>     |
| <b>CL1188.Contig1_All</b> | 0.01     | 0.13     | 3.70                   | NPF8.4  | <i>Eutrema salsugineum</i>     |
| CL8124.Contig3_All        | 2.41     | 15.89    | 2.72                   | NPF6.3b | <i>Eutrema salsugineum</i>     |
| <b>CL1892.Contig6_All</b> | 0.01     | 0.05     | 2.32                   | NPF2.11 | <i>Arabidopsis thaliana</i>    |
| CL3282.Contig1_All        | 6.9      | 33.19    | 2.27                   | NPF6.2a | <i>Eutrema salsugineum</i>     |
| CL2487.Contig3_All        | 0.38     | 1.57     | 2.05                   | NPF5.9b | <i>Eutrema salsugineum</i>     |
| CL1209.Contig3_All        | 4.02     | 10.77    | 1.42                   | NPF2.13 | <i>Brassica napus</i>          |
| CL6278.Contig1_All        | 2.29     | 5.41     | 1.24                   | NPF8.1a | <i>Eutrema salsugineum</i>     |
| CL2487.Contig1_All        | 1.65     | 3.71     | 1.17                   | NPF5.9a | <i>Eutrema salsugineum</i>     |
| Unigene30347_All          | 1.04     | 2.12     | 1.03                   | NPF4.7  | <i>Eutrema salsugineum</i>     |
| Unigene13454_All          | 4.08     | 1.57     | -1.38                  | NPF8.2  | <i>Eutrema salsugineum</i>     |
| CL5549.Contig1_All        | 1.2      | 0.37     | -1.70                  | NPF2.7  | <i>Arabidopsis thaliana</i>    |
| CL10017.Contig3_All       | 0.52     | 0.01     | -5.70                  | NPF5.15 | <i>Eutrema salsugineum</i>     |
| CL2487.Contig2_All        | 1.05     | 0.01     | -6.71                  | NPF5.9  | <i>Eutrema salsugineum</i>     |
| Unigene15665_All          | 2.25     | 0.01     | -7.81                  | NPF7.3  | <i>Brassica napus</i>          |
| CL10017.Contig1_All       | 2.89     | 0.01     | -8.17                  | NPF5.15 | <i>Eutrema salsugineum</i>     |
| <b>CL141.Contig8_All</b>  | 0.01     | 4.35     | 8.76                   | SOS1    | <i>Thellungiella halophila</i> |

|                           |       |       |       |                              |                             |
|---------------------------|-------|-------|-------|------------------------------|-----------------------------|
| <b>CL1096.Contig4_All</b> | 0.01  | 2.53  | 7.98  | NHX5                         | <i>Arabidopsis thaliana</i> |
| CL1096.Contig10_All       | 1.11  | 2.72  | 1.29  | NHX6                         | <i>Arabidopsis thaliana</i> |
| CL4173.Contig1_All        | 7.26  | 14.76 | 1.02  | NHX2                         | <i>Arabidopsis thaliana</i> |
| Unigene20453_All          | 0.22  | 0.01  | -4.46 | NHX4                         | <i>Eutrema salsugineum</i>  |
| CL6534.Contig4_All        | 17.64 | 6.58  | -1.42 | NCX                          | <i>Arabidopsis thaliana</i> |
| CL3604.Contig8_All        | 0.55  | 1.61  | 1.55  | GLR3.3a                      | <i>Brassica napus</i>       |
| CL3834.Contig2_All        | 0.06  | 0.35  | 2.54  | HKT1                         | <i>Brassica napus</i>       |
| CL1280.Contig5_All        | 3.98  | 15.47 | 1.96  | KUP2                         | <i>Arabidopsis thaliana</i> |
| CL4846.Contig1_All        | 0.64  | 1.86  | 1.54  | KT2b                         | <i>Brassica napus</i>       |
| CL2337.Contig1_All        | 0.96  | 0.01  | -6.58 | KUP9                         | <i>Camelina sativa</i>      |
| CL166.Contig1_All         | 24.6  | 8.23  | -1.58 | SKOR                         | <i>Arabidopsis thaliana</i> |
| CL1585.Contig1_All        | 2.07  | 5.44  | 1.39  | KEA6a                        | <i>Brassica rapa</i>        |
| CL1585.Contig4_All        | 0.72  | 0.01  | -6.17 | KEA6b                        | <i>Brassica napus</i>       |
| <b>CL3663.Contig7_All</b> | 0.01  | 1.81  | 7.50  | CNGC6a                       | <i>Camelina sativa</i>      |
| Unigene6900_All           | 0.4   | 1.79  | 2.16  | CNGC1b                       | <i>Arabidopsis thaliana</i> |
| Unigene5024_All           | 0.75  | 1.86  | 1.31  | CNGC1a                       | <i>Arabidopsis thaliana</i> |
| CL1912.Contig1_All        | 0.59  | 0.01  | -5.88 | V-CHX18                      | <i>Arabidopsis thaliana</i> |
| Unigene16699_All          | 0.61  | 3.02  | 2.31  | Sultr1.2b                    | <i>Brassica rapa</i>        |
| CL7451.Contig1_All        | 3.57  | 7.36  | 1.04  | Sultr2.2                     | <i>Brassica rapa</i>        |
| CL7423.Contig3_All        | 0.91  | 4.04  | 2.15  | ZnT                          | <i>Camelina sativa</i>      |
| CL9830.Contig1_All        | 2.49  | 5.84  | 1.23  | ZnT                          | <i>Arabidopsis thaliana</i> |
| <b>Unigene4968_All</b>    | 0.01  | 18.61 | 10.86 | CTR5a                        | <i>Brassica napus</i>       |
| Unigene13264_All          | 1.81  | 6.66  | 1.88  | CTR5b                        | <i>Brassica napus</i>       |
| CL8249.Contig2_All        | 1.31  | 3.79  | 1.53  | CTR4                         | <i>Brassica napus</i>       |
| Unigene6326_All           | 29.25 | 69.68 | 1.25  | CTR1c                        | <i>Brassica rapa</i>        |
| Unigene3070_All           | 7.24  | 14.5  | 1.00  | CTR1b                        | <i>Brassica rapa</i>        |
| Unigene29796_All          | 21.99 | 6.49  | -1.76 | CTR5c                        | <i>Brassica napus</i>       |
| CL2740.Contig2_All        | 7.97  | 3.06  | -1.38 | MnT PDR2                     | <i>Camelina sativa</i>      |
| <b>CL7845.Contig1_All</b> | 0.01  | 1.13  | 6.82  | MGT                          | <i>Arabidopsis thaliana</i> |
| Unigene1617_All           | 0.63  | 3.27  | 2.38  | MGT                          | <i>Arabidopsis thaliana</i> |
| CL2740.Contig1_All        | 4.97  | 10.65 | 1.10  | MGT                          | <i>Camelina sativa</i>      |
| CL6691.Contig2_All        | 81.69 | 23.51 | -1.80 | AMT1.1                       | <i>Camelina sativa</i>      |
| CL6691.Contig1_All        | 2.88  | 0.76  | -1.92 | AMT1.2                       | <i>Arabidopsis thaliana</i> |
| CL1590.Contig1_All        | 20.13 | 4.91  | -2.04 | AMT2                         | <i>Brassica rapa</i>        |
| <b>CL6281.Contig2_All</b> | 0.01  | 6.75  | 9.40  | V-H <sup>+</sup> ATPase e1   | <i>Arabidopsis thaliana</i> |
| CL2339.Contig1_All        | 0.24  | 3.49  | 3.86  | V-H <sup>+</sup> ATPase c1   | <i>Camelina sativa</i>      |
| Unigene3164_All           | 69.02 | 32.95 | -1.07 | V-H <sup>+</sup> ATPase f    | <i>Camelina sativa</i>      |
| CL9511.Contig2_All        | 10.58 | 4.56  | -1.21 | V-H <sup>+</sup> ATPase c2   | <i>Arabidopsis thaliana</i> |
| CL4850.Contig2_All        | 0.82  | 0.01  | -6.36 | V-H <sup>+</sup> ATPase h    | <i>Brassica napus</i>       |
| CL1819.Contig2_All        | 0.27  | 10.36 | 5.26  | P-H <sup>+</sup> ATPase      | <i>Arabidopsis thaliana</i> |
| CL1141.Contig1_All        | 11.3  | 24.38 | 1.11  | P-H <sup>+</sup> ATPase 2    | <i>Camelina sativa</i>      |
| Unigene15025_All          | 22.37 | 47.16 | 1.08  | P-H <sup>+</sup> ATPase 3    | <i>Brassica napus</i>       |
| CL3452.Contig2_All        | 0.06  | 3.78  | 5.98  | P-Ca <sup>2+</sup> ATPase 1  | <i>Arabidopsis thaliana</i> |
| CL972.Contig1_All         | 1.98  | 0.3   | -2.72 | P-Ca <sup>2+</sup> ATPase 10 | <i>Brassica rapa</i>        |
| Unigene8285_All           | 2.35  | 0.09  | -4.71 | P-Ca <sup>2+</sup> ATPase 13 | <i>Arabidopsis thaliana</i> |

**Table S6.** Differentially expressed genes (DEGs) related to ion transport in shoots of *P. cornutum* after 50 mM NaCl treatment for 24 h. C24S RPKM and S24S RPKM indicates the RPKM value of a gene in shoots under control condition for 24 h and salt treatment for 24 h respectively. Fold change equals to  $\log_2$  (S24S RPKM / C24S RPKM) and indicates the transcript abundance change of each DEGs. Protein is the protein encoded by each DEGs. The Gene ID of each upregulated DEGs with no expression under control condition is in bold.

| Gene ID                   | C24S RPKM | S24S RPKM | Log <sub>2</sub> Ratio | Protein | Most homologous species |
|---------------------------|-----------|-----------|------------------------|---------|-------------------------|
| <b>CL4002.Contig2_All</b> | 0.01      | 1.5       | 7.23                   | CCC1    | <i>Camelina sativa</i>  |
| CL2577.Contig3_All        | 4.83      | 16.23     | 1.75                   | CLCf    | <i>Camelina sativa</i>  |

|                            |       |       |       |                              |                             |
|----------------------------|-------|-------|-------|------------------------------|-----------------------------|
| CL2477.Contig4_All         | 9.68  | 21.99 | 1.18  | CLCg                         | <i>Camelina sativa</i>      |
| <b>Unigene7084_All</b>     | 0.01  | 1.95  | 7.61  | NPF5.2                       | <i>Eutrema salsugineum</i>  |
| <b>CL3282.Contig2_All</b>  | 0.01  | 1.31  | 7.03  | NPF6.2b                      | <i>Eutrema salsugineum</i>  |
| <b>CL6278.Contig1_All</b>  | 0.01  | 0.49  | 5.61  | NPF8.1a                      | <i>Eutrema salsugineum</i>  |
| <b>CL568.Contig1_All</b>   | 0.01  | 0.05  | 2.32  | NPF2.1                       | <i>Brassica napus</i>       |
| CL2487.Contig3_All         | 0.98  | 3.07  | 1.65  | NPF5.9b                      | <i>Eutrema salsugineum</i>  |
| CL4142.Contig1_All         | 3.37  | 6.87  | 1.03  | NPF7.3                       | <i>Brassica napus</i>       |
| CL1188.Contig4_All         | 1.91  | 0.9   | -1.09 | NPF8.4                       | <i>Eutrema salsugineum</i>  |
| CL10017.Contig1_All        | 2.08  | 0.89  | -1.22 | NPF5.15                      | <i>Eutrema salsugineum</i>  |
| CL5549.Contig1_All         | 0.09  | 0.01  | -3.17 | NPF2.7a                      | <i>Arabidopsis thaliana</i> |
| Unigene12441_All           | 0.27  | 0.01  | -4.75 | NPF2.12                      | <i>Raphanus sativus</i>     |
| CL3477.Contig1_All         | 0.28  | 0.01  | -4.81 | NPF4.4                       | <i>Eutrema salsugineum</i>  |
| CL5549.Contig2_All         | 0.44  | 0.01  | -5.46 | NPF2.7b                      | <i>Arabidopsis thaliana</i> |
| <b>CL1096.Contig10_All</b> | 0.01  | 1.08  | 6.75  | NHX6                         | <i>Eutrema salsugineum</i>  |
| Unigene7147_All            | 0.43  | 1.25  | 1.54  | NHX1                         | <i>Capsella rubella</i>     |
| CL1096.Contig4_All         | 2.18  | 4.57  | 1.07  | NHX5                         | <i>Arabidopsis thaliana</i> |
| CL141.Contig1_All          | 0.23  | 0.01  | -4.52 | NHX8                         | <i>Eutrema salsugineum</i>  |
| CL2417.Contig1_All         | 3.05  | 13.97 | 2.20  | NCX3                         | <i>Arabidopsis thaliana</i> |
| CL6534.Contig4_All         | 7.68  | 2.62  | -1.55 | NCX1                         | <i>Arabidopsis thaliana</i> |
| CL7855.Contig1_All         | 3.51  | 1.52  | -1.21 | GLR1.2                       | <i>Camelina sativa</i>      |
| CL66.Contig2_All           | 2.47  | 0.87  | -1.51 | GLR3.4                       | <i>Camelina sativa</i>      |
| CL415.Contig2_All          | 1.43  | 0.39  | -1.87 | GLR3.2                       | <i>Arabidopsis thaliana</i> |
| CL3604.Contig6_All         | 1.1   | 0.01  | -6.78 | GLR3.3a                      | <i>Brassica napus</i>       |
| <b>CL3834.Contig2_All</b>  | 0.01  | 1.51  | 7.24  | HKT1                         | <i>Brassica napus</i>       |
| CL1280.Contig6_All         | 0.51  | 1.54  | 1.59  | KUP2                         | <i>Arabidopsis thaliana</i> |
| CL5926.Contig1_All         | 1.29  | 2.62  | 1.02  | KT2a                         | <i>Brassica napus</i>       |
| Unigene5974_All            | 0.59  | 0.19  | -1.63 | KT3                          | <i>Eutrema salsugineum</i>  |
| CL5926.Contig2_All         | 2.39  | 0.01  | -7.90 | KT2b                         | <i>Brassica napus</i>       |
| CL2337.Contig9_All         | 5.76  | 0.01  | -9.17 | KUP9                         | <i>Camelina sativa</i>      |
| CL1599.Contig2_All         | 1.76  | 5.56  | 1.66  | KEA4                         | <i>Arabidopsis thaliana</i> |
| CL1585.Contig6_All         | 0.74  | 0.01  | -6.21 | KEA6                         | <i>Brassica napus</i>       |
| CL166.Contig1_All          | 13.17 | 3.14  | -2.07 | SKOR                         | <i>Arabidopsis thaliana</i> |
| <b>CL9004.Contig2_All</b>  | 0.01  | 3.37  | 8.40  | GORK                         | <i>Arabidopsis thaliana</i> |
| <b>Unigene12647_All</b>    | 0.01  | 0.43  | 5.43  | CNGC8b                       | <i>Eutrema salsugineum</i>  |
| Unigene6900_All            | 0.25  | 0.82  | 1.71  | CNGC1b                       | <i>Arabidopsis thaliana</i> |
| Unigene5024_All            | 1.77  | 0.78  | -1.18 | CNGC1a                       | <i>Arabidopsis thaliana</i> |
| Unigene6260_All            | 0.83  | 0.31  | -1.42 | CNGC14                       | <i>Eutrema salsugineum</i>  |
| Unigene1860_All            | 0.18  | 0.01  | -4.17 | CNGC8a                       | <i>Eutrema salsugineum</i>  |
| CL3663.Contig7_All         | 1.36  | 0.01  | -7.09 | CNGC6a                       | <i>Camelina sativa</i>      |
| CL1894.Contig2_All         | 1.49  | 0.4   | -1.90 | Sultr3.4                     | <i>Camelina sativa</i>      |
| CL7314.Contig1_All         | 3.03  | 8.07  | 1.41  | ZnT                          | <i>Arabidopsis thaliana</i> |
| CL7423.Contig3_All         | 0.91  | 0.01  | -6.51 | ZnT                          | <i>Camelina sativa</i>      |
| <b>Unigene13264_All</b>    | 0.01  | 4.84  | 8.92  | CTR5b                        | <i>Brassica napus</i>       |
| Unigene29796_All           | 1.69  | 7.64  | 2.18  | CTR5c                        | <i>Brassica napus</i>       |
| CL8249.Contig1_All         | 4.25  | 9.58  | 1.17  | CTR1a                        | <i>Brassica napus</i>       |
| Unigene4968_All            | 9.06  | 0.01  | -9.82 | CTR5a                        | <i>Brassica napus</i>       |
| <b>CL2740.Contig2_All</b>  | 0.01  | 5.34  | 9.06  | MnT PDR2                     | <i>Camelina sativa</i>      |
| <b>Unigene1619_All</b>     | 0.01  | 1.67  | 7.38  | MGT10b                       | <i>Arabidopsis thaliana</i> |
| Unigene1617_All            | 0.66  | 3.22  | 2.29  | MGT10a                       | <i>Arabidopsis thaliana</i> |
| CL1590.Contig1_All         | 2.43  | 0.15  | -4.02 | AMT2                         | <i>Brassica rapa</i>        |
| <b>Unigene17151_All</b>    | 0.01  | 2.34  | 7.87  | V-H <sup>+</sup> ATPase c2   | <i>Camelina sativa</i>      |
| <b>CL4850.Contig2_All</b>  | 0.01  | 1.95  | 7.61  | V-H <sup>+</sup> ATPase h    | <i>Brassica napus</i>       |
| CL972.Contig1_All          | 0.3   | 1.37  | 2.19  | P-Ca <sup>2+</sup> ATPase 10 | <i>Brassica rapa</i>        |
| CL3452.Contig4_All         | 15.26 | 3.03  | -2.33 | P-Ca <sup>2+</sup> ATPase 1  | <i>Arabidopsis thaliana</i> |

**Table S7.** Differentially expressed genes (DEGs) related to ROS-scavenging system in roots of *P. cornutum* after 50 mM NaCl treatment for 6 h. C6R RPKM and S6R RPKM indicates the

RPKM value of a gene in roots under control condition for 6 h and salt treatment for 6 h respectively. Fold change equals to  $\log_2(S6R \text{ RPKM} / C6R \text{ RPKM})$  and indicates the transcript abundance change of each DEGs. Protein is the protein encoded by each DEGs. The Gene ID of each upregulated DEGs with no expression under control condition is in bold.

| Gene ID                   | C6R RPKM | S6R RPKM | Log <sub>2</sub> Ratio | Protein | Most homologous species     |
|---------------------------|----------|----------|------------------------|---------|-----------------------------|
| Unigene1431_All           | 33.27    | 69.27    | 1.06                   | GLR-C1  | <i>Eutrema salsugineum</i>  |
| Unigene5963_All           | 191.25   | 68.67    | -1.48                  | GLR-S13 | <i>Arabidopsis thaliana</i> |
| <b>CL887.Contig5_All</b>  | 0.01     | 1.23     | 6.94                   | APX5    | <i>Arabidopsis thaliana</i> |
| Unigene8734_All           | 24.62    | 55.94    | 1.18                   | APX1    | <i>Arabidopsis thaliana</i> |
| <b>CL110.Contig1_All</b>  | 0.01     | 11.77    | 10.20                  | GST-U10 | <i>Arabidopsis lyrata</i>   |
| CL2973.Contig2_All        | 1.44     | 58.87    | 5.35                   | GST-F3  | <i>Arabidopsis thaliana</i> |
| CL5907.Contig2_All        | 0.76     | 4.52     | 2.57                   | GST-U5  | <i>Arabidopsis thaliana</i> |
| CL2973.Contig4_All        | 39.43    | 98.6     | 1.32                   | GST-F6a | <i>Brassica oleracea</i>    |
| CL5128.Contig1_All        | 1.82     | 4.36     | 1.26                   | GST-F2  | <i>Brassica napus</i>       |
| Unigene11304_All          | 7.73     | 18.03    | 1.22                   | GST-U28 | <i>Arabidopsis lyrata</i>   |
| CL9702.Contig2_All        | 36.46    | 78.01    | 1.10                   | GST-L1  | <i>Arabidopsis thaliana</i> |
| Unigene10083_All          | 76.97    | 164.29   | 1.09                   | GST-U12 | <i>Brassica oleracea</i>    |
| Unigene29119_All          | 163.4    | 344.2    | 1.07                   | GST-F6b | <i>Brassica oleracea</i>    |
| Unigene9630_All           | 23.9     | 9.94     | -1.27                  | GST-F11 | <i>Arabidopsis thaliana</i> |
| Unigene11523_All          | 159.8    | 60.18    | -1.41                  | GST-U19 | <i>Arabidopsis thaliana</i> |
| CL4061.Contig2_All        | 1.59     | 4.13     | 1.38                   | GPX1b   | <i>Brassica napus</i>       |
| CL4061.Contig1_All        | 7.03     | 3.33     | -1.08                  | GPX1a   | <i>Brassica napus</i>       |
| <b>CL2989.Contig3_All</b> | 0.01     | 1.43     | 7.16                   | PEX3-1a | <i>Arabidopsis thaliana</i> |
| CL9369.Contig2_All        | 6.84     | 18.4     | 1.43                   | PEX11e  | <i>Arabidopsis thaliana</i> |
| CL9371.Contig1_All        | 0.72     | 3.72     | 2.37                   | Trxh10  | <i>Eutrema salsugineum</i>  |
| Unigene16702_All          | 77.29    | 248.91   | 1.69                   | Trxh8   | <i>Eutrema salsugineum</i>  |
| CL1304.Contig3_All        | 3.68     | 11.76    | 1.68                   | NTrx3   | <i>Eutrema salsugineum</i>  |
| CL8308.Contig3_All        | 5.46     | 15.37    | 1.49                   | Trxm2   | <i>Eutrema salsugineum</i>  |
| CL5332.Contig5_All        | 0.63     | 0.01     | -5.98                  | Trxh9   | <i>Eutrema salsugineum</i>  |

**Table S8.** Differentially expressed genes (DEGs) related to ROS-scavenging system in roots of *P. cornutum* after 50 mM NaCl treatment for 24 h. C24R RPKM and S24R RPKM indicates the RPKM value of a gene in roots under control condition for 24 h and salt treatment for 24 h respectively. Fold change equals to  $\log_2(S24R \text{ RPKM} / C24R \text{ RPKM})$  and indicates the transcript abundance change of each DEGs. Protein is the protein encoded by each DEGs. The Gene ID of each upregulated DEGs with no expression under control condition is in bold.

| Gene ID                  | C24R RPKM | S24R RPKM | Log <sub>2</sub> Ratio | Protein  | Most homologous species     |
|--------------------------|-----------|-----------|------------------------|----------|-----------------------------|
| Unigene18864_All         | 1.79      | 6.82      | 1.93                   | GLR-C8   | <i>Camelina sativa</i>      |
| CL887.Contig5_All        | 1.23      | 0.01      | -6.94                  | APX5     | <i>Arabidopsis thaliana</i> |
| CL4446.Contig2_All       | 2.78      | 0.01      | -8.12                  | APX6     | <i>Arabidopsis thaliana</i> |
| <b>CL110.Contig1_All</b> | 0.01      | 13.2      | 10.37                  | GST-U10  | <i>Arabidopsis thaliana</i> |
| Unigene18400_All         | 7.11      | 84.14     | 3.56                   | GST-F5   | <i>Arabidopsis thaliana</i> |
| CL6349.Contig3_All       | 65.73     | 245.7     | 1.90                   | GST-R1   | <i>Arabidopsis thaliana</i> |
| Unigene9630_All          | 5.87      | 15.79     | 1.43                   | GST-F11  | <i>Arabidopsis thaliana</i> |
| CL7899.Contig2_All       | 14.32     | 31.19     | 1.12                   | GST-U22  | <i>Arabidopsis thaliana</i> |
| Unigene19878_All         | 20.9      | 10.08     | -1.05                  | GST-U21  | <i>Arabidopsis lyrata</i>   |
| Unigene5105_All          | 100.27    | 47.54     | -1.08                  | GST-U7   | <i>Arabidopsis thaliana</i> |
| Unigene19876_All         | 64.42     | 8.48      | -2.93                  | GST-U11b | <i>Arabidopsis lyrata</i>   |
| CL7537.Contig1_All       | 179.44    | 23.06     | -2.96                  | GST-U11a | <i>Brassica napus</i>       |
| Unigene5116_All          | 12.11     | 0.62      | -4.29                  | GST-U4   | <i>Arabidopsis thaliana</i> |
| Unigene5565_All          | 3.49      | 0.01      | -8.45                  | GST-U18  | <i>Arabidopsis thaliana</i> |
| CL9702.Contig3_All       | 83.27     | 0.01      | -13.02                 | GST-L1   | <i>Arabidopsis thaliana</i> |
| CL3965.Contig2_All       | 1.86      | 0.13      | -3.84                  | GPX2     | <i>Arabidopsis thaliana</i> |

|                           |        |        |       |           |                             |
|---------------------------|--------|--------|-------|-----------|-----------------------------|
| CL2179.Contig1_All        | 105.8  | 35.25  | -1.59 | GPX6      | <i>Arabidopsis thaliana</i> |
| Unigene8465_All           | 5.69   | 1.92   | -1.57 | GPX3      | <i>Camelina sativa</i>      |
| CL3935.Contig2_All        | 3.9    | 13.51  | 1.79  | POD7      | <i>Brassica rapa</i>        |
| CL1020.Contig1_All        | 2.39   | 7.11   | 1.57  | POD34     | <i>Raphanus sativus</i>     |
| CL1440.Contig4_All        | 1.53   | 0.01   | -7.26 | POD53     | <i>Arabidopsis lyrata</i>   |
| Unigene19077_All          | 24.72  | 3.78   | -2.71 | POD22     | <i>Raphanus sativus</i>     |
| CL6178.Contig2_All        | 6.4    | 1.48   | -2.11 | POD11     | <i>Arabidopsis lyrata</i>   |
| Unigene20272_All          | 9.27   | 2.56   | -1.86 | POD44     | <i>Camelina sativa</i>      |
| Unigene372_All            | 13.71  | 4.27   | -1.68 | POD17     | <i>Brassica rapa</i>        |
| CL1299.Contig3_All        | 5.2    | 2.04   | -1.35 | POD2a     | <i>Arabidopsis thaliana</i> |
| CL9448.Contig3_All        | 123.09 | 54.44  | -1.18 | POD37     | <i>Arabidopsis thaliana</i> |
| Unigene21509_All          | 118.13 | 57.05  | -1.05 | POD56     | <i>Arabidopsis thaliana</i> |
| CL9260.Contig1_All        | 155.12 | 75.65  | -1.04 | POD52     | <i>Arabidopsis thaliana</i> |
| Unigene724_All            | 34.57  | 17.04  | -1.02 | POD2b     | <i>Arabidopsis thaliana</i> |
| CL1859.Contig3_All        | 336.7  | 787.37 | 1.23  | CAT3      | <i>Arabidopsis thaliana</i> |
| Unigene2251_All           | 66.16  | 12.88  | -2.36 | CAT2      | <i>Raphanus sativus</i>     |
| <b>CL2989.Contig6_All</b> | 0.01   | 2.22   | 7.79  | PEX3-1a   | <i>Arabidopsis thaliana</i> |
| CL2989.Contig4_All        | 2.27   | 0.01   | -7.83 | PEX3-1b   | <i>Arabidopsis thaliana</i> |
| CL511.Contig8_All         | 0.8    | 0.01   | -6.32 | PEX2      | <i>Arabidopsis lyrata</i>   |
| <b>CL3847.Contig3_All</b> | 0.01   | 5.54   | 9.11  | Trxf1     | <i>Arabidopsis thaliana</i> |
| <b>CL5332.Contig7_All</b> | 0.01   | 2.39   | 7.90  | Trxh9     | <i>Arabidopsis thaliana</i> |
| <b>CL7421.Contig1_All</b> | 0.01   | 1.43   | 7.16  | Trxm4     | <i>Arabidopsis lyrata</i>   |
| Unigene16702_All          | 47.13  | 112.49 | 1.26  | Trxh8     | <i>Raphanus sativus</i>     |
| CL1304.Contig4_All        | 12.68  | 4.74   | -1.42 | NTrx3     | <i>Arabidopsis thaliana</i> |
| Unigene14588_All          | 7.71   | 2.23   | -1.79 | Trxm3     | <i>Arabidopsis thaliana</i> |
| Unigene8256_All           | 5.41   | 1.51   | -1.84 | Trxh9     | <i>Arabidopsis thaliana</i> |
| CL4087.Contig2_All        | 3.76   | 13.58  | 1.85  | SOD Cu-Zn | <i>Arabidopsis thaliana</i> |
| Unigene9945_All           | 11.59  | 3.25   | -1.83 | SOD Mn    | <i>Arabidopsis thaliana</i> |

**Table S9.** Differentially expressed genes (DEGs) related to ROS-scavenging system in shoots of *P. cornutum* after 50 mM NaCl treatment for 6 h. C6S RPKM and S6S RPKM indicates the RPKM value of a gene in shoots under control condition for 6 h and salt treatment for 6 h respectively. Fold change equals to  $\log_2$ (S6S RPKM / C6S RPKM) and indicates the transcript abundance change of each DEGs. Protein is the protein encoded by each DEGs. The Gene ID of each upregulated DEGs with no expression under control condition is in bold.

| Gene ID                   | C6S RPKM | S6S RPKM | $\log_2$ Ratio | Protein | Most homologous species     |
|---------------------------|----------|----------|----------------|---------|-----------------------------|
| Unigene3075_All           | 57.12    | 5.9      | -3.28          | GLR-C9  | <i>Arabidopsis lyrata</i>   |
| CL7050.Contig3_All        | 5.47     | 2.03     | -1.43          | GLR-C5  | <i>Arabidopsis thaliana</i> |
| Unigene8088_All           | 7.62     | 3.17     | -1.27          | GLR-S11 | <i>Brassica napus</i>       |
| CL4446.Contig2_All        | 26.03    | 5.12     | -2.35          | APX6    | <i>Arabidopsis thaliana</i> |
| <b>CL767.Contig4_All</b>  | 0.01     | 6.41     | 9.32           | GST-F9  | <i>Arabidopsis thaliana</i> |
| L2973.Contig3_All         | 0.61     | 2.86     | 2.23           | GST-F3  | <i>Arabidopsis thaliana</i> |
| Unigene8549_All           | 8.77     | 20.86    | 1.25           | GST-U24 | <i>Arabidopsis thaliana</i> |
| CL8158.Contig2_All        | 106.21   | 31.75    | -1.74          | GST-U12 | <i>Arabidopsis thaliana</i> |
| Unigene16310_All          | 4.31     | 0.12     | -5.17          | GST-F12 | <i>Arabidopsis thaliana</i> |
| Unigene14577_All          | 1.48     | 0.01     | -7.21          | GST-F7  | <i>Arabidopsis thaliana</i> |
| CL4061.Contig2_All        | 2.01     | 4.73     | 1.23           | GPX1    | <i>Arabidopsis thaliana</i> |
| CL3965.Contig1_All        | 6.29     | 2.23     | -1.50          | GPX2    | <i>Arabidopsis thaliana</i> |
| <b>CL3093.Contig7_All</b> | 0.01     | 1.73     | 7.43           | POD43   | <i>Arabidopsis lyrata</i>   |
| CL2485.Contig1_All        | 2.48     | 7.48     | 1.59           | POD44   | <i>Arabidopsis lyrata</i>   |
| Unigene6483_All           | 12.5     | 3.87     | -1.69          | POD12   | <i>Arabidopsis lyrata</i>   |
| CL7594.Contig2_All        | 4.3      | 0.23     | -4.22          | POD71   | <i>Arabidopsis lyrata</i>   |
| CL1440.Contig1_All        | 2.27     | 0.01     | -7.83          | POD2    | <i>Arabidopsis thaliana</i> |
| <b>CL2989.Contig1_All</b> | 0.01     | 1.48     | 7.21           | PEX3-1a | <i>Arabidopsis thaliana</i> |
| CL9369.Contig2_All        | 5.07     | 10.39    | 1.04           | PEX11E  | <i>Arabidopsis thaliana</i> |



|                           |        |        |       |              |                             |
|---------------------------|--------|--------|-------|--------------|-----------------------------|
| <b>CL9371.Contig2_All</b> | 0.01   | 2.02   | 7.66  | Trx4         | <i>Arabidopsis lyrata</i>   |
| <b>CL270.Contig3_All</b>  | 0.01   | 1.79   | 7.48  | Trx-O2       | <i>Arabidopsis thaliana</i> |
| CL3202.Contig3_All        | 0.56   | 2.7    | 2.27  | Trx1         | <i>Arabidopsis lyrata</i>   |
| Unigene9687_All           | 2.42   | 7.56   | 1.64  | Trx2b        | <i>Capsella rubella</i>     |
| CL1304.Contig4_All        | 0.68   | 1.67   | 1.30  | NTrx3        | <i>Eutrema salsugineum</i>  |
| CL8308.Contig3_All        | 126.58 | 269.65 | 1.09  | Trx-M2       | <i>Eutrema salsugineum</i>  |
| CL9371.Contig1_All        | 3.9    | 0.01   | -8.61 | Trx6         | <i>Eutrema salsugineum</i>  |
| CL6394.Contig6_All        | 9.03   | 3.26   | -1.47 | Trx2a        | <i>Eutrema salsugineum</i>  |
| Unigene12562_All          | 9.52   | 66.03  | 2.80  | 2-Cys PrxR B | <i>Eutrema salsugineum</i>  |

**Table S10.** Differentially expressed genes (DEGs) related to ROS-scavenging system in shoots of *P. cornutum* after 50 mM NaCl treatment for 24 h. C24S RPKM and S24S RPKM indicates the RPKM value of a gene in shoots under control condition for 24 h and salt treatment for 24 h respectively. Fold change equals to  $\log_2$  (S24S RPKM / C24S RPKM) and indicates the transcript abundance change of each DEGs. Protein is the protein encoded by each DEGs. The Gene ID of each upregulated DEGs with no expression under control condition is in bold.

| Gene ID                   | C24S RPKM | S24S RPKM | Log <sub>2</sub> Ratio | Protein   | Most homologous species     |
|---------------------------|-----------|-----------|------------------------|-----------|-----------------------------|
| Unigene3075_All           | 34.1      | 4.18      | 3                      | GLR-C9    | <i>Arabidopsis lyrata</i>   |
| CL2770.Contig1_All        | 5.84      | 13.96     | 1.26                   | APX1      | <i>Arabidopsis thaliana</i> |
| CL4446.Contig2_All        | 13.02     | 4.99      | -1.38                  | APX6      | <i>Arabidopsis thaliana</i> |
| CL2261.Contig1_All        | 0.97      | 3.33      | 1.78                   | GST-L3    | <i>Arabidopsis thaliana</i> |
| Unigene9682_All           | 6.16      | 2.34      | -1.40                  | GST-U13   | <i>Arabidopsis thaliana</i> |
| Unigene20207_All          | 14.06     | 5.18      | -1.44                  | GST-U22   | <i>Arabidopsis thaliana</i> |
| Unigene8549_All           | 15.75     | 4.71      | -1.74                  | GST-U24   | <i>Arabidopsis thaliana</i> |
| CL3965.Contig1_All        | 2.17      | 0.01      | -7.76                  | GPX2      | <i>Arabidopsis thaliana</i> |
| CL7594.Contig2_All        | 2.16      | 0.16      | -3.75                  | POD71     | <i>Eutrema salsugineum</i>  |
| CL1859.Contig3_All        | 927.78    | 2016.81   | 1.12                   | CAT3      | <i>Eutrema salsugineum</i>  |
| <b>CL2989.Contig1_All</b> | 0.01      | 2.31      | 7.85                   | PEX3-1a   | <i>Arabidopsis thaliana</i> |
| CL2989.Contig3_All        | 4.08      | 1.75      | -1.22                  | PEX3-1b   | <i>Eutrema salsugineum</i>  |
| CL7826.Contig1_All        | 1.51      | 5.86      | 1.96                   | Trx-S8    | <i>Eutrema salsugineum</i>  |
| CL8397.Contig2_All        | 4.55      | 9.84      | 1.11                   | Trx3-3    | <i>Eutrema salsugineum</i>  |
| CL9646.Contig1_All        | 2.39      | 7.32      | 1.61                   | Trx3-2    | <i>Eutrema salsugineum</i>  |
| <b>CL4050.Contig1_All</b> | 0.01      | 3.31      | 8.37                   | SOD Cu-Zn | <i>Eutrema salsugineum</i>  |
| Unigene9945_All           | 20.71     | 0.73      | -4.83                  | SOD Mn    | <i>Eutrema salsugineum</i>  |

**Table S11.** Differentially expressed genes (DEGs) related to photosynthesis in shoots of *P. cornutum* after 50 mM NaCl treatment for 6 h. C6S RPKM and S6S RPKM indicates the RPKM value of a gene in shoots under control condition for 6 h and salt treatment for 6 h respectively. Fold change equals to  $\log_2$  (S6S RPKM / C6S RPKM) and indicates the transcript abundance change of each DEGs. Protein is the protein encoded by each DEGs. The Gene ID of each upregulated DEGs with no expression under control condition is in bold.

|                          | Gene ID                   | C6S RPKM | S6S RPKM | Log <sub>2</sub> Ratio | Protein                                                       | Most homologous species     |
|--------------------------|---------------------------|----------|----------|------------------------|---------------------------------------------------------------|-----------------------------|
| Chlorophyll biosynthesis | <b>CL5192.Contig2_All</b> | 0.01     | 1.33     | 7.06                   | protoporphyrinogen oxidase 2                                  | <i>Capsella rubella</i>     |
|                          | <b>CL6305.Contig1_All</b> | 0.01     | 0.96     | 6.58                   | uroporphyrinogen-III C-methyltransferase                      | <i>Brassica rapa</i>        |
|                          | CL6357.Contig2_All        | 0.3      | 2.32     | 2.95                   | uroporphyrinogen-III C-methyltransferase                      | <i>Arabidopsis lyrata</i>   |
|                          | CL1.Contig6_All           | 0.5      | 2.73     | 2.45                   | uroporphyrinogen-III synthase                                 | <i>Eutrema salsugineum</i>  |
|                          | CL1607.Contig4_All        | 17.49    | 47.94    | 1.45                   | uroporphyrinogen decarboxylase 1                              | <i>Eutrema salsugineum</i>  |
|                          | Unigene18440_All          | 0.48     | 0.01     | -5.58                  | protoporphyrinogen oxidase 1                                  | <i>Eutrema salsugineum</i>  |
|                          | CL3982.Contig3_All        | 0.85     | 0.01     | -6.41                  | protoporphyrinogen oxidase 2                                  | <i>Eutrema salsugineum</i>  |
| Chlorophyll catabolism   | <b>CL6260.Contig2_All</b> | 0.01     | 0.27     | 4.75                   | chlorophyll catabolite reductase                              | <i>Eutrema salsugineum</i>  |
| Photosystem II           | <b>Unigene29512_All</b>   | 0.01     | 5.08     | 8.99                   | oxygen-evolving enhancer protein 3-1                          | <i>Raphanus sativus</i>     |
|                          | Unigene31068_All          | 1.08     | 10.82    | 3.32                   | CP43 chlorophyll apoprotein                                   | <i>Eutrema salsugineum</i>  |
|                          | Unigene5160_All           | 9.83     | 74.71    | 2.93                   | CP47 chlorophyll apoprotein                                   | <i>Eutrema salsugineum</i>  |
|                          | CL3345.Contig2_All        | 2.17     | 6.38     | 1.56                   | reaction center PsbP family protein                           | <i>Capsella rubella</i>     |
|                          | CL5255.Contig3_All        | 12.15    | 26.58    | 1.13                   | LOW PSII ACCUMULATION 1                                       | <i>Camelina sativa</i>      |
|                          | Unigene29750_All          | 201.87   | 84.27    | -1.26                  | oxygen-evolving enhancer protein 2-1                          | <i>Eutrema salsugineum</i>  |
|                          | Unigene15722_All          | 328.23   | 134.3    | -1.29                  | chlorophyll a-b binding protein 1                             | <i>Capsella rubella</i>     |
|                          | CL877.Contig2_All         | 7.5      | 0.01     | -9.55                  | chlorophyll a-b binding protein 5                             | <i>Capsella rubella</i>     |
| Photosystem I            | CL874.Contig1_All         | 0.27     | 3.55     | 3.72                   | P700 chlorophyll a apoprotein A1                              | <i>Pugionium dolabratum</i> |
|                          | Unigene30660_All          | 1.74     | 17.8     | 3.35                   | P700 chlorophyll a apoprotein A2                              | <i>Pugionium dolabratum</i> |
|                          | Unigene17981_All          | 2.02     | 9.29     | 2.20                   | P700 chlorophyll a apoprotein A1                              | <i>Pugionium dolabratum</i> |
| Cytochrome b6/f          | CL2412.Contig4_All        | 0.02     | 0.4      | 4.32                   | cytochrome b6                                                 | <i>Pugionium dolabratum</i> |
|                          | Unigene30216_All          | 0.11     | 0.45     | 2.03                   | cytochrome f                                                  | <i>Pugionium dolabratum</i> |
| Ferredoxin               | CL1825.Contig7_All        | 1.44     | 5.45     | 1.92                   | ferredoxin-dependent glutamate synthase 2                     | <i>Raphanus sativus</i>     |
|                          | CL6172.Contig3_All        | 2.74     | 0.86     | -1.67                  | ferredoxin-NADP <sup>+</sup> reductase                        | <i>Arabidopsis lyrata</i>   |
| Carbon fixation          | <b>Unigene9951_All</b>    | 0.01     | 14.02    | 10.45                  | ribulose-bisphosphate carboxylase                             | <i>Pugionium dolabratum</i> |
|                          | <b>CL4472.Contig3_All</b> | 0.01     | 2.34     | 7.87                   | 2-phosphoglycerate kinase                                     | <i>Arabidopsis lyrata</i>   |
|                          | <b>Unigene30776_All</b>   | 0.01     | 0.94     | 6.55                   | 2-phosphoglycerate kinase                                     | <i>Arabidopsis lyrata</i>   |
|                          | <b>Unigene25114_All</b>   | 0.01     | 0.64     | 6                      | NADP-dependent malic enzyme 1                                 | <i>Eutrema salsugineum</i>  |
|                          | CL4773.Contig6_All        | 0.46     | 4.46     | 3.28                   | NADP-dependent malic enzyme 3                                 | <i>Eutrema salsugineum</i>  |
|                          | Unigene265_All            | 0.12     | 0.5      | 2.06                   | NADP-dependent malic enzyme 1                                 | <i>Camelina sativa</i>      |
|                          | CL3053.Contig5_All        | 4.08     | 15.87    | 1.96                   | malate dehydrogenase                                          | <i>Eutrema salsugineum</i>  |
|                          | CL4623.Contig2_All        | 1.01     | 3.71     | 1.88                   | NADP-dependent malic enzyme 2                                 | <i>Arabidopsis lyrata</i>   |
|                          | CL7513.Contig4_All        | 27.1     | 90.55    | 1.74                   | triosephosphate isomerase                                     | <i>Eutrema salsugineum</i>  |
|                          | Unigene10475_All          | 41.2     | 135.81   | 1.72                   | NADP-dependent malic enzyme 4                                 | <i>Capsella rubella</i>     |
|                          | CL3695.Contig2_All        | 2.19     | 5.91     | 1.43                   | alanine-glyoxylate transaminase 2                             | <i>Eutrema salsugineum</i>  |
|                          | CL3851.Contig1_All        | 10.06    | 24.25    | 1.27                   | phosphoglycerate kinase 1                                     | <i>Brassica napus</i>       |
|                          | CL670.Contig5_All         | 3.49     | 7.94     | 1.19                   | alanine aminotransferase 1                                    | <i>Eutrema salsugineum</i>  |
|                          | CL10208.Contig2_All       | 2.42     | 5.18     | 1.10                   | phosphoenolpyruvate carboxylase 1                             | <i>Eutrema salsugineum</i>  |
|                          | Unigene5231_All           | 0.39     | 0.83     | 1.09                   | NADP-dependent malic enzyme 1                                 | <i>Arabidopsis lyrata</i>   |
|                          | Unigene10001_All          | 2.33     | 4.76     | 1.03                   | phosphoglycerate kinase                                       | <i>Eutrema salsugineum</i>  |
|                          | CL429.Contig4_All         | 0.71     | 1.44     | 1.02                   | glyceraldehyde-3-phosphate dehydrogenase                      | <i>Eutrema salsugineum</i>  |
|                          | Unigene6383_All           | 376      | 3        | 1                      | glyceraldehyde-3-phosphate dehydrogenase 2                    | <i>Eutrema salsugineum</i>  |
|                          | CL8434.Contig1_All        | 5.73     | 2.78     | -1.04                  | glyceraldehyde-3-phosphate dehydrogenase 2                    | <i>Arabidopsis lyrata</i>   |
|                          | CL7406.Contig1_All        | 59.46    | 25.33    | -1.23                  | phosphoenolpyruvate carboxykinase 1                           | <i>Arabidopsis thaliana</i> |
|                          | CL6324.Contig2_All        | 19.03    | 7.58     | -1.33                  | ribulose-1,5 bisphosphate carboxylase/oxygenase large subunit | <i>Arabidopsis lyrata</i>   |
|                          | CL3106.Contig2_All        | 317.69   | 100.34   | -1.66                  | fructose-bisphosphate aldolase 2                              | <i>Eutrema salsugineum</i>  |
|                          | Unigene753_All            | 0.65     | 0.01     | -6.02                  | 2-phosphoglycerate kinase                                     | <i>Camelina sativa</i>      |

|              |                         |      |      |       |                                                                 |                             |
|--------------|-------------------------|------|------|-------|-----------------------------------------------------------------|-----------------------------|
|              | CL7058.Contig1_All      | 4.23 | 0.01 | -8.72 | ribulose-1,5 biphosphate<br>carboxylase/oxygenase large subunit | <i>Eutrema salsugineum</i>  |
| ATP synthase | CL9868.Contig1_All      | 0.04 | 0.42 | 3.39  | H <sup>+</sup> -transporting ATP synthase subunit a             | <i>Arabidopsis thaliana</i> |
|              | <b>Unigene21905_All</b> | 0.01 | 0.06 | 2.58  | H <sup>+</sup> -transporting ATP synthase subunit alpha         | <i>Arabidopsis thaliana</i> |
|              | Unigene10005_All        | 0.12 | 0.62 | 2.37  | H <sup>+</sup> -transporting ATP synthase subunit b             | <i>Arabidopsis thaliana</i> |
|              | Unigene30032_All        | 1.34 | 3.83 | 1.52  | H <sup>+</sup> -transporting ATP synthase subunit beta          | <i>Arabidopsis thaliana</i> |
|              | CL1597.Contig1_All      | 7.76 | 2.34 | 1.05  | H <sup>+</sup> -transporting ATP synthase subunit e             | <i>Arabidopsis thaliana</i> |

**Table S12.** Differentially expressed genes (DEGs) related to photosynthesis in shoots of *P. cornutum* after 50 mM NaCl treatment for 24 h. C24S RPKM and S24S RPKM indicates the RPKM value of a gene in shoots under control condition for 24 h and salt treatment for 24 h respectively. Fold change equals to  $\log_2$  (S24S RPKM / C24S RPKM) and indicates the transcript abundance change of each DEGs. Protein is the protein encoded by each DEGs. The Gene ID of each upregulated DEGs with no expression under control condition is in bold.

|                             | Gene ID                   | C24S<br>RPKM | S24S<br>RPKM | Log <sub>2</sub><br>Ratio | Protein                                       | Most homologous<br>species        |
|-----------------------------|---------------------------|--------------|--------------|---------------------------|-----------------------------------------------|-----------------------------------|
| Chlorophyll<br>biosynthesis | <b>CL4285.Contig3_All</b> | 0.01         | 1.09         | 6.77                      | coproporphyrinogen-III oxidase 1              | <i>Arabidopsis lyrata</i>         |
|                             | <b>CL3982.Contig4_All</b> | 0.01         | 0.67         | 6.07                      | protoporphyrinogen oxidase 2                  | <i>Eutrema salsugineum</i>        |
|                             | CL1607.Contig3_All        | 2.09         | 18.65        | 3.16                      | uroporphyrinogen decarboxylase 1              | <i>Eutrema salsugineum</i>        |
|                             | CL6357.Contig2_All        | 1.52         | 3.44         | 1.18                      | uroporphyrinogen III methyltransferase        | <i>Arabidopsis thaliana</i>       |
|                             | CL1.Contig9_All           | 0.86         | 0.09         | -3.26                     | uroporphyrinogen-III synthase                 | <i>Eutrema salsugineum</i>        |
| Chlorophyll<br>catabolism   | <b>CL6260.Contig2_All</b> | 0.01         | 0.3          | 4.91                      | chlorophyll catabolite reductase              | <i>Eutrema salsugineum</i>        |
| Photosystem II              | <b>CL5140.Contig1_All</b> | 0.01         | 0.9          | 6.49                      | oxygen-evolving enhancer protein 2-1          | <i>Eutrema salsugineum</i>        |
|                             | CL877.Contig2_All         | 2.54         | 13.19        | 2.38                      | chlorophyll a-b binding protein 26            | <i>Eutrema salsugineum</i>        |
|                             | Unigene30458_All          | 0.8          | 0.39         | -1.04                     | oxygen-evolving enhancer protein 3            | <i>Pugionium dolabratum</i>       |
|                             | CL3690.Contig2_All        | 17.17        | 5.38         | -1.67                     | reaction center Psb Protein 4                 | <i>Eutrema salsugineum</i>        |
|                             | Unigene30695_All          | 13.24        | 3.34         | -1.99                     | CP47 chlorophyll apoprotein                   | <i>Pugionium dolabratum</i>       |
|                             | CL9163.Contig1_All        | 4.35         | 0.88         | -2.31                     | reaction center Psb Protein                   | <i>Pugionium dolabratum</i>       |
|                             | Unigene5160_All           | 61.78        | 10.87        | -2.51                     | P680 reaction center D1 protein               | <i>Pugionium dolabratum</i>       |
|                             | Unigene31068_All          | 19           | 1.31         | -3.86                     | CP43 chlorophyll apoprotein                   | <i>Pugionium dolabratum</i>       |
|                             | Unigene30208_All          | 1.96         | 0.09         | -4.44                     | cytochrome b559 subunit alpha                 | <i>Pugionium dolabratum</i>       |
| CL5255.Contig1_All          | 4.06                      | 0.01         | -8.67        | LOW PSII ACCUMULATION 1   | <i>Arabidopsis lyrata</i>                     |                                   |
| Photosystem I               | CL1039.Contig2_All        | 2.07         | 4.47         | 1.11                      | photosystem I subunit K                       | <i>Arabidopsis thaliana</i>       |
|                             | Unigene13985_All          | 6.21         | 1.44         | -2.11                     | P700 chlorophyll a apoprotein A1              | <i>Pugionium dolabratum</i>       |
|                             | Unigene30660_All          | 33.67        | 1.77         | -4.25                     | P700 chlorophyll a apoprotein A2              | <i>Pugionium dolabratum</i>       |
|                             | Unigene31256_All          | 0.22         | 0.01         | -4.46                     | photosystem I assembly protein Ycf3           | <i>Arabidopsis thaliana</i>       |
|                             | CL874.Contig1_All         | 6.11         | 0.25         | -4.61                     | P700 chlorophyll a apoprotein A1              | <i>Pugionium dolabratum</i>       |
|                             | Unigene17981_All          | 31.28        | 0.91         | -5.10                     | P700 chlorophyll a apoprotein A1              | <i>Pugionium dolabratum</i>       |
| Cytochrome<br>b6/f          | Unigene30216_All          | 4063         | 26           | 3                         | cytochrome f                                  | <i>Pugionium dolabratum</i>       |
|                             | CL2412.Contig4_All        | 2.9          | 1.05         | -1.47                     | cytochrome b6                                 | <i>Pugionium dolabratum</i>       |
| Ferredoxin                  | <b>CL6172.Contig2_All</b> | 0.01         | 0.94         | 6.55                      | ferredoxin-NADP <sup>+</sup> reductase        | <i>Arabidopsis lyrata</i>         |
|                             | <b>CL5399.Contig2_All</b> | 0.01         | 0.31         | 4.95                      | ferredoxin oxidoreductase                     | <i>Brassica napus</i>             |
|                             | CL1825.Contig7_All        | 1.19         | 4.01         | 1.75                      | ferredoxin-dependent glutamate synthase 2     | <i>Raphanus sativus</i>           |
| Carbon<br>fixation          | <b>CL429.Contig6_All</b>  | 0.01         | 45.2         | 12.14                     | glyceraldehyde-3-phosphate dehydrogenase      | <i>Eutrema salsugineum</i>        |
|                             | <b>CL1969.Contig2_All</b> | 0.01         | 2.31         | 7.85                      | alanine aminotransferase 1                    | <i>Eutrema salsugineum</i>        |
|                             | <b>Unigene265_All</b>     | 0.01         | 1.12         | 6.81                      | NADP-dependent malic enzyme 1                 | <i>Camelina sativa</i>            |
|                             | <b>CL4472.Contig4_All</b> | 0.01         | 1.07         | 6.74                      | 2-phosphoglycerate kinase                     | <i>Arabidopsis lyrata</i>         |
|                             | <b>Unigene26264_All</b>   | 0.01         | 0.32         | 5                         | fructose-bisphosphate aldolase                | <i>Frankliniella occidentalis</i> |
|                             | <b>CL4271.Contig1_All</b> | 0.01         | 0.2          | 4.32                      | ribulose-bisphosphate carboxylase large chain | <i>Pugionium dolabratum</i>       |
|                             | <b>Unigene23280_All</b>   | 0.01         | 0.13         | 3.70                      | glyceraldehyde-3-phosphate dehydrogenase 2    | <i>Frankliniella occidentalis</i> |
|                             | Unigene25114_All          | 0.32         | 3.45         | 3.43                      | NADP-dependent malic enzyme 1                 | <i>Eutrema salsugineum</i>        |
|                             | Unigene5231_All           | 0.56         | 3.13         | 2.48                      | NADP-dependent malic enzyme 1                 | <i>Arabidopsis lyrata</i>         |
|                             | CL3695.Contig2_All        | 2.27         | 7.04         | 1.63                      | alanine-glyoxylate transaminase 2             | <i>Eutrema salsugineum</i>        |

|              |                         |         |         |        |                                                                                         |                             |
|--------------|-------------------------|---------|---------|--------|-----------------------------------------------------------------------------------------|-----------------------------|
|              | CL8417.Contig3_All      | 1.23    | 3.74    | 1.60   | ribulose-1,5 biphosphate<br>carboxylase/oxygenase large subunit N-<br>methyltransferase | <i>Eutrema salsugineum</i>  |
|              | CL6045.Contig4_All      | 0.49    | 1.44    | 1.56   | phosphoenolpyruvate carboxykinase                                                       | <i>Brassica napus</i>       |
|              | CL8434.Contig3_All      | 0.41    | 1.19    | 1.54   | glyceraldehyde-3-phosphate dehydrogenase 2                                              | <i>Arabidopsis lyrata</i>   |
|              | CL3851.Contig3_All      | 1.19    | 3.39    | 1.51   | phosphoglycerate kinase 1                                                               | <i>Brassica napus</i>       |
|              | CL4623.Contig4_All      | 0.9     | 2.43    | 1.43   | NADP-dependent malic enzyme 2                                                           | <i>Arabidopsis lyrata</i>   |
|              | Unigene30785_All        | 250.72  | 610.29  | 1.28   | ribulose biphosphate carboxylase small chain<br>1B                                      | <i>Arabidopsis lyrata</i>   |
|              | CL7513.Contig1_All      | 9.53    | 21.08   | 1.15   | triosephosphate isomerase                                                               | <i>Eutrema salsugineum</i>  |
|              | CL3053.Contig5_All      | 8.39    | 17.65   | 1.07   | malate dehydrogenase                                                                    | <i>Eutrema salsugineum</i>  |
|              | CL2188.Contig3_All      | 4.34    | 8.88    | 1.03   | fructose-2,6-bisphosphatase                                                             | <i>Camelina sativa</i>      |
|              | CL7406.Contig2_All      | 1108    | 2       | 1      | phosphoenolpyruvate carboxykinase 1                                                     | <i>Arabidopsis thaliana</i> |
|              | Unigene30776_All        | 0.67    | 0.33    | -1.02  | 2-phosphoglycerate kinase                                                               | <i>Arabidopsis lyrata</i>   |
|              | Unigene834_All          | 2.36    | 0.92    | -1.36  | phosphoenolpyruvate carboxykinase 2                                                     | <i>Brassica napus</i>       |
|              | CL4773.Contig6_All      | 2.5     | 0.97    | -1.37  | NADP-dependent malic enzyme 3                                                           | <i>Eutrema salsugineum</i>  |
|              | CL861.Contig4_All       | 9482.71 | 2219.23 | -2.10  | ribulose biphosphate carboxylase small chain<br>1B                                      | <i>Eutrema salsugineum</i>  |
|              | Unigene9041_All         | 0.57    | 0.01    | -5.83  | glyceraldehyde-3-phosphate dehydrogenase 1                                              | <i>Eutrema salsugineum</i>  |
|              | Unigene9951_All         | 23.69   | 0.01    | -11.21 | ribulose-bisphosphate carboxylase                                                       | <i>Pugionium dolabratum</i> |
|              | <b>Unigene18322_All</b> | 0.01    | 0.28    | 4.81   | H <sup>+</sup> -transporting ATPase subunit beta                                        | <i>Eutrema salsugineum</i>  |
|              | <b>Unigene16853_All</b> | 0.01    | 0.24    | 4.58   | H <sup>+</sup> -transporting ATPase subunit beta                                        | <i>Eutrema salsugineum</i>  |
|              | <b>Unigene16854_All</b> | 0.01    | 0.07    | 2.81   | H <sup>+</sup> -transporting ATPase subunit beta                                        | <i>Eutrema salsugineum</i>  |
| ATP synthase | CL1597.Contig2_All      | 6.87    | 2.24    | -1.62  | H <sup>+</sup> -transporting ATPase subunit e                                           | <i>Arabidopsis thaliana</i> |
|              | Unigene10005_All        | 0.5     | 0.16    | -1.64  | H <sup>+</sup> -transporting ATPase subunit b                                           | <i>Arabidopsis thaliana</i> |
|              | Unigene5734_All         | 2.03    | 0.22    | -3.21  | H <sup>+</sup> -transporting ATPase subunit epsilon                                     | <i>Arabidopsis thaliana</i> |
|              | CL9868.Contig1_All      | 0.88    | 0.07    | -3.65  | H <sup>+</sup> -transporting ATPase subunit a                                           | <i>Arabidopsis thaliana</i> |
|              | CL9157.Contig1_All      | 11.38   | 0.01    | -10.15 | H <sup>+</sup> -transporting ATPase subunit gamma                                       | <i>Arabidopsis thaliana</i> |

1 **Table S13.** Differentially expressed genes (DEGs) related to transcript factors in roots of *P. cornutum*  
2 after 50 mM NaCl treatment for 6 h. C6R RPKM and S6R RPKM indicates the RPKM value of a gene  
3 in shoots under control condition for 6 h and salt treatment for 6 h respectively. Fold change equals  
4 to  $\log_2$ (S6R RPKM / C6R RPKM) and indicates the transcript abundance change of each DEGs. Protein  
5 is the protein encoded by each DEGs. The Gene ID of each upregulated DEGs with no expression  
6 under control condition is in bold.

| Gene ID                    | C6R RPKM | S6R RPKM | Log <sub>2</sub> Ratio | Protein  | Most homologous species     |
|----------------------------|----------|----------|------------------------|----------|-----------------------------|
| <b>CL2623.Contig9_All</b>  | 0.01     | 0.79     | 6.30                   | WRKY4    | <i>Eutrema salsugineum</i>  |
| Unigene1949_All            | 1.38     | 5.76     | 2.06                   | WRKY38   | <i>Arabidopsis thaliana</i> |
| CL8480.Contig1_All         | 4.61     | 15.62    | 1.76                   | WRKY51   | <i>Eutrema salsugineum</i>  |
| CL9644.Contig1_All         | 5.36     | 17.95    | 1.74                   | WRKY21   | <i>Eutrema salsugineum</i>  |
| Unigene9981_All            | 1.29     | 4.25     | 1.72                   | WRKY33b  | <i>Eutrema salsugineum</i>  |
| CL8143.Contig1_All         | 1.66     | 5.25     | 1.66                   | WRKY40   | <i>Camelina sativa</i>      |
| Unigene20839_All           | 2.77     | 8.54     | 1.62                   | WRKY71   | <i>Eutrema salsugineum</i>  |
| CL5153.Contig1_All         | 3.22     | 8.35     | 1.37                   | WRKY33a  | <i>Eutrema salsugineum</i>  |
| CL2762.Contig1_All         | 4.33     | 10.95    | 1.34                   | WRKY2    | <i>Eutrema salsugineum</i>  |
| Unigene14671_All           | 13.19    | 32.86    | 1.32                   | WRKY54b  | <i>Raphanus sativus</i>     |
| Unigene11284_All           | 35.45    | 81.49    | 1.20                   | WRKY54a  | <i>Arabidopsis lyrata</i>   |
| CL1359.Contig1_All         | 6.69     | 15.3     | 1.19                   | WRKY36   | <i>Eutrema salsugineum</i>  |
| CL6227.Contig1_All         | 4.66     | 9.92     | 1.09                   | WRKY15   | <i>Eutrema salsugineum</i>  |
| Unigene19359_All           | 12.66    | 25.94    | 1.03                   | WRKY14   | <i>Raphanus sativus</i>     |
| CL2682.Contig2_All         | 95.97    | 45.12    | -1.09                  | WRKY11   | <i>Eutrema salsugineum</i>  |
| CL8454.Contig4_All         | 12.93    | 3.33     | -1.96                  | WRKY48   | <i>Arabidopsis lyrata</i>   |
| Unigene3510_All            | 4.94     | 1.11     | -2.15                  | WRKY13   | <i>Eutrema salsugineum</i>  |
| Unigene20840_All           | 4.35     | 0.62     | -2.81                  | WRKY28b  | <i>Eutrema salsugineum</i>  |
| CL3331.Contig1_All         | 0.71     | 0.01     | -6.15                  | WRKY19   | <i>Arabidopsis lyrata</i>   |
| CL2519.Contig2_All         | 1.24     | 0.01     | -6.95                  | WRKY20a  | <i>Arabidopsis lyrata</i>   |
| Unigene20838_All           | 4.08     | 0.01     | -8.67                  | WRKY28a  | <i>Brassica napus</i>       |
| <b>CL1196.Contig22_All</b> | 0.01     | 3.01     | 8.23                   | MYB58    | <i>Eutrema salsugineum</i>  |
| <b>CL6244.Contig1_All</b>  | 0.01     | 2.24     | 7.81                   | MYB122b  | <i>Eutrema salsugineum</i>  |
| Unigene19694_All           | 1        | 4.5      | 2.17                   | MYB108   | <i>Raphanus sativus</i>     |
| CL2438.Contig2_All         | 7.06     | 29.31    | 2.05                   | MYB-PHL7 | <i>Eutrema salsugineum</i>  |
| CL9050.Contig1_All         | 12.59    | 47.13    | 1.90                   | MYB-EFMa | <i>Camelina sativa</i>      |
| Unigene19391_All           | 1.53     | 5.58     | 1.87                   | MYB40    | <i>Arabidopsis thaliana</i> |
| CL577.Contig2_All          | 1.83     | 6.51     | 1.83                   | MYB20    | <i>Eutrema salsugineum</i>  |
| Unigene29272_All           | 1.33     | 4.6      | 1.79                   | MYB1R1   | <i>Eutrema salsugineum</i>  |
| CL9449.Contig2_All         | 2.6      | 7.63     | 1.55                   | MYB96    | <i>Camelina sativa</i>      |
| CL3530.Contig3_All         | 1.98     | 5.44     | 1.46                   | MYB122a  | <i>Arabidopsis lyrata</i>   |
| CL2633.Contig7_All         | 10.52    | 28.63    | 1.44                   | MYB48    | <i>Arabidopsis thaliana</i> |
| Unigene3660_All            | 7.44     | 18.21    | 1.29                   | MYB88    | <i>Eutrema salsugineum</i>  |
| Unigene28974_All           | 5.81     | 13.46    | 1.21                   | MYB122c  | <i>Arabidopsis lyrata</i>   |
| Unigene17362_All           | 15.76    | 36.18    | 1.20                   | MYB3     | <i>Eutrema salsugineum</i>  |
| CL8127.Contig2_All         | 19.01    | 41.06    | 1.11                   | MYB36    | <i>Brassica napus</i>       |
| CL2633.Contig8_All         | 8.36     | 16.72    | 1                      | MYB59    | <i>Arabidopsis lyrata</i>   |
| CL5738.Contig2_All         | 128.94   | 63.08    | -1.03                  | MYB44    | <i>Eutrema salsugineum</i>  |
| Unigene13074_All           | 22.87    | 10.7     | -1.10                  | MYB-EFMb | <i>Eutrema salsugineum</i>  |
| Unigene20058_All           | 12.92    | 5.97     | -1.11                  | MYB37    | <i>Arabidopsis thaliana</i> |
| Unigene19446_All           | 7.23     | 2.57     | -1.49                  | MYB13    | <i>Eutrema salsugineum</i>  |
| CL5738.Contig1_All         | 23.08    | 5.27     | -2.13                  | MYB77    | <i>Eutrema salsugineum</i>  |
| CL3717.Contig2_All         | 8.12     | 1.71     | -2.25                  | MYB12    | <i>Brassica rapa</i>        |
| Unigene28975_All           | 2.46     | 0.01     | -7.94                  | MYB122d  | <i>Arabidopsis lyrata</i>   |
| CL6419.Contig1_All         | 6.02     | 0.01     | -9.23                  | MYB78    | <i>Arabidopsis lyrata</i>   |
| <b>CL9137.Contig2_All</b>  | 0.01     | 1.03     | 6.69                   | HD-ZIP18 | <i>Arabidopsis thaliana</i> |
| Unigene3374_All            | 0.52     | 3.1      | 2.58                   | HD-ZIP15 | <i>Eutrema salsugineum</i>  |
| Unigene20784_All           | 0.74     | 3.43     | 2.21                   | HD-ZIP21 | <i>Arabidopsis thaliana</i> |

|                            |        |        |       |                   |                             |
|----------------------------|--------|--------|-------|-------------------|-----------------------------|
| CL98.Contig4_All           | 0.82   | 3.35   | 2.03  | HD-ZIP17          | <i>Camelina sativa</i>      |
| CL2896.Contig1_All         | 2.42   | 8.16   | 1.75  | HD-ZIP14b         | <i>Eutrema salsugineum</i>  |
| Unigene5545_All            | 4.32   | 14.23  | 1.72  | HD-ZIP6           | <i>Eutrema salsugineum</i>  |
| CL8168.Contig1_All         | 2.34   | 7.36   | 1.65  | bZIP24            | <i>Eutrema salsugineum</i>  |
| CL5533.Contig2_All         | 4.82   | 13.39  | 1.47  | HD-ZIP53          | <i>Eutrema salsugineum</i>  |
| Unigene8571_All            | 3.29   | 8.33   | 1.34  | HD-ZIP23          | <i>Arabidopsis thaliana</i> |
| CL3254.Contig1_All         | 12.89  | 26.03  | 1.01  | HD-ZIP22          | <i>Camelina sativa</i>      |
| CL4855.Contig5_All         | 26.27  | 10.16  | -1.37 | HD-ZIP13          | <i>Eutrema salsugineum</i>  |
| CL4977.Contig3_All         | 10.92  | 3.28   | -1.74 | HD-ZIP5           | <i>Eutrema salsugineum</i>  |
| CL723.Contig3_All          | 1.46   | 0.01   | -7.19 | HD-ZIP14b         | <i>Eutrema salsugineum</i>  |
| CL197.Contig3_All          | 0.05   | 0.99   | 4.31  | ERF RAF2-7        | <i>Arabidopsis thaliana</i> |
| CL5798.Contig2_All         | 2.81   | 12.58  | 2.16  | ERF1B             | <i>Eutrema salsugineum</i>  |
| CL156.Contig5_All          | 0.74   | 2.49   | 1.75  | ERF WR11          | <i>Eutrema salsugineum</i>  |
| CL1308.Contig3_All         | 2.71   | 7.45   | 1.46  | ERF TOE2          | <i>Arabidopsis lyrata</i>   |
| Unigene2238_All            | 5.59   | 14.47  | 1.37  | ERF AIL6          | <i>Eutrema salsugineum</i>  |
| Unigene5006_All            | 12.43  | 25.51  | 1.04  | ERF AIL6          | <i>Eutrema salsugineum</i>  |
| Unigene9671_All            | 30.37  | 12.63  | -1.27 | ERF13             | <i>Arabidopsis thaliana</i> |
| Unigene9911_All            | 42.35  | 17.26  | -1.29 | ERF4a             | <i>Eutrema salsugineum</i>  |
| Unigene1604_All            | 353.22 | 118.74 | -1.57 | ERF RAP2-3        | <i>Eutrema salsugineum</i>  |
| CL4895.Contig1_All         | 37.81  | 12.6   | -1.59 | ERF17             | <i>Arabidopsis thaliana</i> |
| Unigene12966_All           | 9.77   | 2.16   | -2.18 | ERF4b             | <i>Eutrema salsugineum</i>  |
| CL1295.Contig8_All         | 3.25   | 0.01   | -8.34 | AP2.2             | <i>Arabidopsis thaliana</i> |
| CL4528.Contig2_All         | 4.96   | 17.43  | 1.81  | NAC62             | <i>Eutrema salsugineum</i>  |
| <b>CL2022.Contig17_All</b> | 0.01   | 2.43   | 7.92  | bHLH82            | <i>Eutrema salsugineum</i>  |
| <b>CL6271.Contig3_All</b>  | 0.01   | 1.61   | 7.33  | bHLH51            | <i>Eutrema salsugineum</i>  |
| <b>CL7056.Contig2_All</b>  | 0.01   | 0.78   | 6.29  | bHLH3             | <i>Arabidopsis lyrata</i>   |
| CL6100.Contig2_All         | 25.54  | 12.07  | -1.08 | bHLH96            | <i>Camelina sativa</i>      |
| <b>CL1346.Contig3_All</b>  | 0.01   | 4.53   | 8.82  | MADS-box AGL16    | <i>Eutrema salsugineum</i>  |
| <b>CL757.Contig6_All</b>   | 0.01   | 2.29   | 7.84  | MADS-box AGL27    | <i>Arabidopsis thaliana</i> |
| <b>CL1755.Contig6_All</b>  | 0.01   | 1.31   | 7.03  | MADS-box AGL29    | <i>Arabidopsis thaliana</i> |
| CL1494.Contig4_All         | 0.1    | 6.18   | 5.95  | MADS-box AGL30    | <i>Arabidopsis lyrata</i>   |
| CL7021.Contig7_All         | 0.1    | 1.73   | 4.11  | MADS-box AGL97    | <i>Camelina sativa</i>      |
| <b>CL1523.Contig2_All</b>  | 0.01   | 12.81  | 10.32 | ZF C2H2/C2HC      | <i>Camelina sativa</i>      |
| <b>CL8710.Contig1_All</b>  | 0.01   | 4.31   | 8.75  | ZF RING           | <i>Arabidopsis thaliana</i> |
| <b>CL898.Contig1_All</b>   | 0.01   | 3.65   | 8.51  | ZF CCHC8a         | <i>Eutrema salsugineum</i>  |
| <b>CL1603.Contig7_All</b>  | 0.01   | 3.46   | 8.43  | ZF C3HC4/RINGa    | <i>Eutrema salsugineum</i>  |
| <b>CL4465.Contig1_All</b>  | 0.01   | 3.07   | 8.26  | ZF CCHC8b         | <i>Arabidopsis lyrata</i>   |
| <b>CL3136.Contig4_All</b>  | 0.01   | 2.89   | 8.17  | ZF BRUTUS         | <i>Eutrema salsugineum</i>  |
| <b>CL317.Contig5_All</b>   | 0.01   | 1.34   | 7.07  | ZF RING/FYVE/PHD  | <i>Arabidopsis thaliana</i> |
| <b>CL7159.Contig2_All</b>  | 0.01   | 0.73   | 6.19  | ZF C3HC4/RINGb    | <i>Arabidopsis thaliana</i> |
| CL650.Contig3_All          | 0.64   | 4.86   | 2.92  | ZF C5HC2          | <i>Arabidopsis thaliana</i> |
| CL6521.Contig2_All         | 1.61   | 5.45   | 1.76  | ZF CCCH5          | <i>Arabidopsis lyrata</i>   |
| CL8567.Contig2_All         | 1.91   | 6.28   | 1.72  | ZF DOF3.6         | <i>Arabidopsis thaliana</i> |
| CL4355.Contig9_All         | 2.02   | 5.44   | 1.43  | ZF RING/FYVE/PHD  | <i>Arabidopsis thaliana</i> |
| CL458.Contig8_All          | 5.23   | 13.86  | 1.41  | ZF CHY/CTCHY/RING | <i>Arabidopsis thaliana</i> |
| CL3278.Contig1_All         | 2.98   | 7.2    | 1.27  | ZF RING-H2        | <i>Camelina sativa</i>      |
| CL2356.Contig1_All         | 75.7   | 36.26  | -1.06 | ZF CCCH29         | <i>Eutrema salsugineum</i>  |
| CL5646.Contig2_All         | 11.19  | 5.32   | -1.07 | ZF DNL            | <i>Eutrema salsugineum</i>  |
| Unigene9451_All            | 78.79  | 37.11  | -1.09 | ZF CCCH20         | <i>Eutrema salsugineum</i>  |
| CL44.Contig2_All           | 3.77   | 1.04   | -1.86 | ZF DOF1.8         | <i>Eutrema salsugineum</i>  |
| CL993.Contig11_All         | 1.14   | 0.31   | -1.88 | ZF CONSTANS9      | <i>Eutrema salsugineum</i>  |
| CL650.Contig2_All          | 4.34   | 0.18   | -4.59 | ZF C5HC2          | <i>Arabidopsis thaliana</i> |
| Unigene3398_All            | 2.54   | 0.09   | -4.82 | ZF RICESLEEPER2   | <i>Eutrema salsugineum</i>  |
| CL7776.Contig2_All         | 1.27   | 0.01   | -6.99 | ZF B-box19        | <i>Eutrema salsugineum</i>  |
| CL93.Contig12_All          | 5.27   | 0.04   | -7.04 | ZF CHY/CTCHY/RING | <i>Arabidopsis thaliana</i> |
| CL9879.Contig1_All         | 1.65   | 0.01   | -7.37 | ZF RING/FYVE/PHD  | <i>Arabidopsis thaliana</i> |
| CL403.Contig4_All          | 4.23   | 0.01   | -8.72 | ZF DOF3.7         | <i>Eutrema salsugineum</i>  |
| CL8003.Contig2_All         | 4.32   | 0.01   | -8.75 | ZF CCCH31         | <i>Brassica oleracea</i>    |

|                    |       |      |       |              |                       |
|--------------------|-------|------|-------|--------------|-----------------------|
| CL3676.Contig2_All | 9.64  | 0.01 | -9.91 | ZF CONSTANS1 | <i>Brassica rapa</i>  |
| Unigene31435_All   | 12.95 | 4.92 | -1.40 | HSP A-1d     | <i>Brassica napus</i> |

7 **Table S14.** Differentially expressed genes (DEGs) related to transcript factors in shoots of *P. cornutum*  
8 after 50 mM NaCl treatment for 6 h. C6S RPKM and S6S RPKM indicates the RPKM value of a gene  
9 in shoots under control condition for 6 h and salt treatment for 6 h respectively. Fold change equals  
10 to  $\log_2$ (S6S RPKM / C6S RPKM) and indicates the transcript abundance change of each DEGs. Protein  
11 is the protein encoded by each DEGs. The Gene ID of each upregulated DEGs with no expression  
12 under control condition is in bold.

| Gene ID                    | C6S<br>RPKM | S6S<br>RPKM | Log <sub>2</sub><br>Ratio | Protein     | Most homologous<br>species  |
|----------------------------|-------------|-------------|---------------------------|-------------|-----------------------------|
| <b>CL2762.Contig4_All</b>  | 0.01        | 2.37        | 7.89                      | WRKY2       | <i>Arabidopsis thaliana</i> |
| <b>CL10201.Contig4_All</b> | 0.01        | 0.85        | 6.41                      | WRKY27      | <i>Camelina sativa</i>      |
| CL2623.Contig2_All         | 1.21        | 6.1         | 2.33                      | WRKY3       | <i>Eutrema salsugineum</i>  |
| CL2623.Contig7_All         | 0.41        | 2.03        | 2.31                      | WRKY4       | <i>Eutrema salsugineum</i>  |
| CL5153.Contig4_All         | 4.3         | 17.75       | 2.05                      | WRKY33a     | <i>Arabidopsis thaliana</i> |
| CL3331.Contig2_All         | 2.12        | 6.58        | 1.63                      | WRKY19      | <i>Arabidopsis lyrata</i>   |
| CL2519.Contig9_All         | 36.93       | 17.29       | -1.09                     | WRKY20c     | <i>Arabidopsis lyrata</i>   |
| CL6904.Contig1_All         | 6.84        | 3.06        | -1.16                     | WRKY62      | <i>Brassica napus</i>       |
| Unigene13522_All           | 163.77      | 68.09       | -1.27                     | WRKY40b     | <i>Arabidopsis lyrata</i>   |
| CL4676.Contig4_All         | 44.86       | 18.49       | -1.28                     | WRKY46      | <i>Arabidopsis lyrata</i>   |
| Unigene12983_All           | 73.72       | 27.3        | -1.43                     | WRKY33c     | <i>Eutrema salsugineum</i>  |
| Unigene13210_All           | 43.94       | 15.7        | -1.48                     | WRKY17      | <i>Eutrema salsugineum</i>  |
| CL6523.Contig4_All         | 53.34       | 18.14       | -1.56                     | WRKY18      | <i>Arabidopsis lyrata</i>   |
| CL9883.Contig1_All         | 30.18       | 9.59        | -1.65                     | WRKY33b     | <i>Eutrema salsugineum</i>  |
| CL2682.Contig2_All         | 32.83       | 8.1         | -2.02                     | WRKY11      | <i>Eutrema salsugineum</i>  |
| CL731.Contig2_All          | 7.49        | 0.9         | -3.06                     | WRKY22b     | <i>Eutrema salsugineum</i>  |
| Unigene8341_All            | 5.22        | 0.56        | -3.22                     | WRKY51      | <i>Arabidopsis lyrata</i>   |
| CL731.Contig1_All          | 35.17       | 3.45        | -3.35                     | WRKY22a     | <i>Eutrema salsugineum</i>  |
| CL9252.Contig1_All         | 2.65        | 0.22        | -3.59                     | WRKY30      | <i>Eutrema salsugineum</i>  |
| CL8098.Contig5_All         | 263.24      | 21.58       | -3.61                     | WRKY53      | <i>Eutrema salsugineum</i>  |
| Unigene11700_All           | 3.04        | 0.2         | -3.93                     | WRKY49      | <i>Eutrema salsugineum</i>  |
| Unigene29588_All           | 21.86       | 1.16        | -4.24                     | WRKY22c     | <i>Arabidopsis lyrata</i>   |
| CL2519.Contig6_All         | 0.84        | 0.01        | -6.39                     | WRKY20b     | <i>Arabidopsis thaliana</i> |
| CL8143.Contig4_All         | 5.56        | 0.01        | -9.12                     | WRKY40a     | <i>Eutrema salsugineum</i>  |
| <b>CL6200.Contig1_All</b>  | 0.01        | 1.96        | 7.61                      | MYB         | <i>Arabidopsis thaliana</i> |
| <b>CL1196.Contig3_All</b>  | 0.01        | 1.78        | 7.48                      | MYB58       | <i>Brassica napus</i>       |
| <b>CL9726.Contig1_All</b>  | 0.01        | 1.59        | 7.31                      | MYB1        | <i>Capsella rubella</i>     |
| <b>CL8144.Contig2_All</b>  | 0.01        | 1.57        | 7.29                      | MYB104      | <i>Eutrema salsugineum</i>  |
| <b>CL8031.Contig3_All</b>  | 0.01        | 1.54        | 7.27                      | MYB106      | <i>Capsella rubella</i>     |
| <b>CL2633.Contig9_All</b>  | 0.01        | 1.15        | 6.85                      | MYB59       | <i>Arabidopsis thaliana</i> |
| CL7166.Contig3_All         | 1.12        | 8.08        | 2.85                      | MYB         | <i>Arabidopsis lyrata</i>   |
| Unigene17362_All           | 3.71        | 16.06       | 2.11                      | MYB3        | <i>Eutrema salsugineum</i>  |
| CL3530.Contig3_All         | 1.72        | 6.33        | 1.88                      | MYB122      | <i>Arabidopsis lyrata</i>   |
| CL5993.Contig3_All         | 1.53        | 5.39        | 1.82                      | MYB2        | <i>Arabidopsis thaliana</i> |
| Unigene1381_All            | 2.57        | 8.59        | 1.74                      | MYB82       | <i>Capsella rubella</i>     |
| CL8169.Contig5_All         | 0.52        | 1.59        | 1.61                      | MYB3R-1     | <i>Eutrema salsugineum</i>  |
| Unigene11649_All           | 41.66       | 96.58       | 1.21                      | MYB28       | <i>Eutrema salsugineum</i>  |
| CL577.Contig2_All          | 2.48        | 5.54        | 1.16                      | MYB20       | <i>Eutrema salsugineum</i>  |
| CL6200.Contig3_All         | 3.32        | 7.19        | 1.11                      | MYB         | <i>Arabidopsis lyrata</i>   |
| CL5738.Contig5_All         | 99.98       | 42.72       | -1.23                     | MYB44       | <i>Eutrema salsugineum</i>  |
| CL4647.Contig1_All         | 81.68       | 28.88       | -1.50                     | MYB34       | <i>Brassica napus</i>       |
| CL9574.Contig2_All         | 2.94        | 0.38        | -2.95                     | MYB15       | <i>Eutrema salsugineum</i>  |
| Unigene14726_All           | 0.12        | 1.88        | 3.97                      | HD-ZIP10    | <i>Arabidopsis thaliana</i> |
| CL4855.Contig1_All         | 0.32        | 2.24        | 2.81                      | HD-ZIP13    | <i>Eutrema salsugineum</i>  |
| Unigene6802_All            | 0.67        | 3.76        | 2.49                      | HD-ZIP7     | <i>Eutrema salsugineum</i>  |
| CL1078.Contig5_All         | 2.01        | 8.48        | 2.08                      | HD-ZIP HDG1 | <i>Brassica rapa</i>        |

|                           |        |        |       |                   |                             |
|---------------------------|--------|--------|-------|-------------------|-----------------------------|
| Unigene199_All            | 12.39  | 47.22  | 1.93  | HD-ZIP16          | <i>Eutrema salsugineum</i>  |
| CL791.Contig3_All         | 13.47  | 5.73   | -1.23 | bZIP2             | <i>Brassica rapa</i>        |
| CL5737.Contig1_All        | 3.79   | 1.21   | -1.66 | bZIP7             | <i>Eutrema salsugineum</i>  |
| Unigene13416_All          | 67.26  | 26.68  | -1.33 | ERF1Ab            | <i>Arabidopsis lyrata</i>   |
| Unigene1753_All           | 66.54  | 22.36  | -1.57 | ERF1Aa            | <i>Eutrema salsugineum</i>  |
| CL4895.Contig1_All        | 183.13 | 59.19  | -1.63 | ERF17             | <i>Eutrema salsugineum</i>  |
| CL6308.Contig2_All        | 2.9    | 0.89   | -1.70 | AP2               | <i>Arabidopsis thaliana</i> |
| Unigene12966_All          | 10.53  | 3.17   | -1.73 | ERF4b             | <i>Eutrema salsugineum</i>  |
| Unigene9911_All           | 71.05  | 17.69  | -2.01 | ERF4a             | <i>Eutrema salsugineum</i>  |
| Unigene9671_All           | 46.81  | 10.36  | -2.18 | ERF13             | <i>Arabidopsis thaliana</i> |
| Unigene8212_All           | 8.98   | 2.03   | -2.15 | ERF6              | <i>Brassica napus</i>       |
| Unigene13757_All          | 5.2    | 0.8    | -2.70 | ERF4c             | <i>Eutrema salsugineum</i>  |
| Unigene8938_All           | 2.06   | 0.01   | -7.69 | ERF1              | <i>Eutrema salsugineum</i>  |
| CL1295.Contig8_All        | 3.77   | 0.01   | -8.56 | AP2.2             | <i>Arabidopsis thaliana</i> |
| <b>CL4528.Contig2_All</b> | 0.01   | 10.39  | 10.02 | NAC62             | <i>Eutrema salsugineum</i>  |
| CL9194.Contig1_All        | 1.5    | 12.31  | 3.04  | bHLH92            | <i>Arabidopsis thaliana</i> |
| CL1277.Contig6_All        | 4.82   | 10.61  | 1.14  | bHLH67            | <i>Arabidopsis thaliana</i> |
| CL7979.Contig1_All        | 2.32   | 0.48   | -2.27 | bHLH121           | <i>Arabidopsis thaliana</i> |
| <b>CL1494.Contig4_All</b> | 0.01   | 6.86   | 9.42  | MADS-box30        | <i>Arabidopsis lyrata</i>   |
| CL757.Contig4_All         | 2.55   | 11.74  | 2.20  | MADS-box31        | <i>Arabidopsis thaliana</i> |
| <b>CL93.Contig7_All</b>   | 0.01   | 10.87  | 10.09 | ZF CHY/CTCHY/RING | <i>Eutrema salsugineum</i>  |
| <b>CL9879.Contig1_All</b> | 0.01   | 4.86   | 8.92  | ZF RING/FYVE/PHD  | <i>Arabidopsis thaliana</i> |
| <b>CL3136.Contig4_All</b> | 0.01   | 4.32   | 8.75  | ZF BRUTUS         | <i>Eutrema salsugineum</i>  |
| <b>CL898.Contig1_All</b>  | 0.01   | 3.84   | 8.58  | ZF CCHC           | <i>Eutrema salsugineum</i>  |
| <b>CL3136.Contig3_All</b> | 0.01   | 3.39   | 8.41  | ZF BRUTUS         | <i>Eutrema salsugineum</i>  |
| <b>CL993.Contig10_All</b> | 0.01   | 2.01   | 7.65  | ZF CONSTANS9      | <i>Eutrema salsugineum</i>  |
| <b>CL5377.Contig2_All</b> | 0.01   | 0.96   | 6.58  | ZF BBX27          | <i>Eutrema salsugineum</i>  |
| CL993.Contig9_All         | 3.68   | 30.72  | 3.06  | ZF CONSTANS9      | <i>Eutrema salsugineum</i>  |
| CL8528.Contig2_All        | 3.55   | 27.83  | 2.97  | ZF CONSTANS6      | <i>Arabidopsis lyrata</i>   |
| CL4355.Contig9_All        | 0.34   | 2.36   | 2.80  | ZF RING/FYVE/PHD  | <i>Arabidopsis thaliana</i> |
| CL4905.Contig1_All        | 0.31   | 1.61   | 2.38  | ZF BBX21          | <i>Eutrema salsugineum</i>  |
| CL44.Contig2_All          | 0.46   | 2.12   | 2.20  | ZF DOF1.8         | <i>Eutrema salsugineum</i>  |
| CL993.Contig2_All         | 0.62   | 2.65   | 2.10  | ZF CONSTANS1      | <i>Camelina sativa</i>      |
| CL242.Contig3_All         | 0.66   | 2.61   | 1.98  | ZF7               | <i>Eutrema salsugineum</i>  |
| CL2491.Contig3_All        | 0.95   | 3.59   | 1.92  | ZF CCHC10         | <i>Eutrema salsugineum</i>  |
| Unigene1924_All           | 0.84   | 3.11   | 1.89  | ZF NURCRACKER     | <i>Eutrema salsugineum</i>  |
| CL4287.Contig2_All        | 7.84   | 28.43  | 1.86  | ZF DOF2.2         | <i>Capsella rubella</i>     |
| CL1212.Contig1_All        | 43.84  | 139.08 | 1.67  | ZF CONSTANS16     | <i>Arabidopsis lyrata</i>   |
| Unigene30519_All          | 28.79  | 85.53  | 1.57  | ZF CONSTANS6      | <i>Brassica nupus</i>       |
| CL5510.Contig2_All        | 2.92   | 8.65   | 1.57  | ZF DOF2.2         | <i>Arabidopsis lyrata</i>   |
| CL2415.Contig1_All        | 38.34  | 110.79 | 1.53  | ZF CONSTANS9      | <i>Brassica nupus</i>       |
| Unigene5109_All           | 3.58   | 9.97   | 1.48  | ZF DOF2.2         | <i>Eutrema salsugineum</i>  |
| CL7040.Contig2_All        | 9.47   | 22.69  | 1.26  | ZF Cys2/His2 2    | <i>Eutrema salsugineum</i>  |
| CL1518.Contig1_All        | 1.92   | 4.55   | 1.24  | ZF GATA           | <i>Eutrema salsugineum</i>  |
| CL7040.Contig1_All        | 37.54  | 79.52  | 1.08  | ZF Cys2/His2 2    | <i>Eutrema salsugineum</i>  |
| Unigene30518_All          | 33.6   | 70.07  | 1.06  | ZF CONSTANS6      | <i>Camelina sativa</i>      |
| Unigene30520_All          | 14.23  | 6.83   | -1.06 | ZF CONSTANS7      | <i>Camelina sativa</i>      |
| CL4355.Contig2_All        | 2.94   | 1.37   | -1.10 | ZF RING/FYVE/PHD  | <i>Arabidopsis thaliana</i> |
| CL8271.Contig4_All        | 38.12  | 17.23  | -1.15 | ZF AN1/C2H2 13    | <i>Arabidopsis lyrata</i>   |
| CL5396.Contig1_All        | 24.59  | 11.04  | -1.16 | ZF RING/FYVE/PHD  | <i>Arabidopsis thaliana</i> |
| CL7279.Contig2_All        | 3.19   | 1.39   | -1.20 | ZF C3HC4/RING     | <i>Arabidopsis thaliana</i> |
| CL8271.Contig1_All        | 59.5   | 21.89  | -1.44 | ZF AN1/C2H2 13    | <i>Arabidopsis lyrata</i>   |
| CL458.Contig8_All         | 2.75   | 0.88   | -1.64 | ZF CHY/CTCHY/RING | <i>Arabidopsis thaliana</i> |
| CL1603.Contig1_All        | 3      | 0.95   | -1.66 | ZF C3HC4/RING     | <i>Arabidopsis thaliana</i> |
| Unigene2658_All           | 6.46   | 1.93   | -1.74 | ZF CCHC20         | <i>Brassica rapa</i>        |
| Unigene13138_All          | 1.93   | 0.33   | -2.55 | ZF BBX28          | <i>Arabidopsis thaliana</i> |
| CL1518.Contig4_All        | 1.44   | 0.23   | -2.65 | ZF GATA27         | <i>Arabidopsis lyrata</i>   |
| CL4465.Contig1_All        | 1.01   | 0.01   | -6.66 | ZF CCHC8          | <i>Camelina sativa</i>      |



|                    |       |       |       |            |                             |
|--------------------|-------|-------|-------|------------|-----------------------------|
| CL2076.Contig5_All | 1.51  | 0.01  | -7.24 | ZF A20/AN1 | <i>Camelina sativa</i>      |
| CL2491.Contig1_All | 1.65  | 0.01  | -7.37 | ZF CCHC10  | <i>Eutrema salsugineum</i>  |
| Unigene16812_All   | 0.01  | 7.8   | 9.61  | HSP3       | <i>Arabidopsis thaliana</i> |
| CL1608.Contig1_All | 0.01  | 6.48  | 9.34  | HSP6       | <i>Eutrema salsugineum</i>  |
| Unigene329_All     | 0.01  | 2.39  | 7.90  | HSP A-4a   | <i>Arabidopsis lyrata</i>   |
| Unigene7975_All    | 1.07  | 38.2  | 5.16  | HSP21      | <i>Arabidopsis lyrata</i>   |
| Unigene3542_All    | 1.65  | 8.42  | 2.35  | HSP23.6    | <i>Arabidopsis thaliana</i> |
| Unigene6938_All    | 6.48  | 19.49 | 1.59  | HSP2       | <i>Arabidopsis thaliana</i> |
| CL2361.Contig5_All | 6.91  | 13.98 | 1.02  | HSP70      | <i>Arabidopsis thaliana</i> |
| CL4377.Contig3_All | 5.28  | 1.98  | -1.42 | HSP89.1    | <i>Arabidopsis lyrata</i>   |
| Unigene1831_All    | 37.58 | 12.93 | -1.54 | HSP A-4a   | <i>Arabidopsis lyrata</i>   |
| CL4153.Contig2_All | 38.05 | 12.03 | -1.66 | HSP A-4a   | <i>Arabidopsis lyrata</i>   |

13 **Table S15.** Expression pattern validation of 20 randomly selected genes in roots of *P. cornutum* under  
14 50 mM NaCl treatment for 6 and 24 h by qRT-PCR method.

| Gene ID in Root    | 6 h     |               | 24 h    |               |
|--------------------|---------|---------------|---------|---------------|
|                    | RNA-seq | Real-time PCR | RNA-seq | Real-time PCR |
| CL110.Contig1_All  | 10.2    | 9.08±0.25     | 10.36   | 9.94±0.29     |
| CL8902.Contig1_All | 9.82    | 9.33±0.34     | 9.75    | 9.98±0.47     |
| CL1547.Contig7_All | 8.75    | 7.56±0.65     | 2.84    | 2.78±0.04     |
| CL4893.Contig2_All | 8.3     | 7.75±0.48     | 7.55    | 4.90±0.16     |
| CL1814.Contig2_All | 6.9     | 4.88±0.43     | 7.55    | 6.85±0.18     |
| Unigene29368_All   | 1.73    | 2.22±0.24     | 9.45    | 8.74±0.21     |
| Unigene16702_All   | 1.69    | 2.01±0.18     | 1.26    | 1.38±0.02     |
| Unigene2556_All    | 1.58    | 1.24±0.31     | 1.07    | -1.25±0.12    |
| Unigene10031_All   | 1.24    | 1.99±0.23     | 1.3     | 1.57±0.14     |
| CL180.Contig7_All  | 5.73    | 2.66±0.51     | 5.17    | 4.60±0.22     |
| CL5558.Contig8_All | 2.88    | 3.01±0.16     | 1.51    | 1.63±0.16     |
| CL8105.Contig1_All | 2.5     | 2.48±0.14     | 2.11    | 1.97±0.18     |
| CL1918.Contig4_All | 2.22    | 2.20±0.21     | 2.2     | 2.73±0.08     |
| CL5798.Contig2_All | 2.16    | 1.99±0.15     | 9.53    | 8.54±0.27     |
| CL5176.Contig7_All | 1.84    | 1.97±0.17     | 8.43    | 3.42±0.19     |
| CL2131.Contig2_All | -10.27  | -4.93±0.42    | -4.29   | -5.34±0.18    |
| CL2682.Contig2_All | -1.09   | -1.22±0.13    | -1.75   | -1.83±0.13    |
| CL2337.Contig2_All | -1.51   | -1.62±0.24    | -1.53   | -1.40±0.09    |
| CL1301.Contig6_All | -1.63   | -1.59±0.22    | -2.05   | -2.63±0.16    |
| Unigene6631_All    | -1.66   | -1.59±0.17    | -2.19   | -1.94±0.02    |

15 **Table S16.** Expression pattern validation of 20 randomly selected genes in shoots of *P. cornutum* under  
16 50 mM NaCl treatment for 6 and 24 h by qRT-PCR method.

| Gene ID in Shoot    | 6 h     |               | 24 h    |               |
|---------------------|---------|---------------|---------|---------------|
|                     | RNA-seq | Real-time PCR | RNA-seq | Real-time PCR |
| CL1608.Contig1_All  | 9.34    | 12.52±1.97    | 2.06    | 2.47±0.19     |
| CL1586.Contig2_All  | 8.81    | 3.28±0.24     | -2.12   | 1.06±0.08     |
| CL2.Contig46_All    | 7.91    | 2.87±0.22     | 5.55    | 3.60±0.08     |
| CL3679.Contig2_All  | 7.44    | 7.23±0.13     | 7.53    | 6.46±0.23     |
| Unigene8549_All     | 1.25    | 1.37±0.15     | -1.74   | -2.12±0.04    |
| Unigene7975_All     | 3.13    | 3.46±0.15     | 5.16    | 1.66±0.06     |
| CL3117.Contig24_All | 4.61    | 4.40±0.25     | 5.98    | 4.91±0.07     |
| CL3756.Contig11_All | 2.58    | 2.89±0.13     | 7.81    | 3.89±0.22     |
| CL338.Contig5_All   | 2.5     | 2.51±0.19     | 1.74    | 1.48±0.09     |
| CL2477.Contig4_All  | 2.42    | 2.34±0.06     | 1.18    | 1.21±0.15     |
| Unigene1617_All     | 2.38    | 2.43±0.37     | 2.29    | 2.66±0.19     |
| CL1825.Contig7_All  | 1.75    | 1.64±0.04     | 1.92    | 1.88±0.17     |

---

|                    |       |            |       |            |
|--------------------|-------|------------|-------|------------|
| CL1767.Contig3_All | 1.64  | 1.56±0.08  | 1.36  | 1.48±0.24  |
| CL5344.Contig1_All | 1.19  | 1.41±0.15  | 1.55  | 1.72±0.16  |
| CL7594.Contig2_All | -4.22 | -3.77±0.13 | -3.75 | -3.45±0.07 |
| CL731.Contig1_All  | -3.35 | -2.32±0.19 | -1.94 | -1.89±0.09 |
| Unigene3186_All    | -3.1  | -1.36±0.05 | -1.8  | -2.09±0.14 |
| Unigene29635_All   | -2.82 | -2.48±0.05 | -2.53 | -2.52±0.21 |
| CL7117.Contig1_All | -2.58 | -2.03±0.13 | -1.59 | -1.24±0.08 |
| CL1590.Contig1_All | -2.04 | -2.26±0.08 | -4.02 | -3.71±0.07 |

---
